# Supplementary material
Source: PubMed Central journal article supplement (PMC5559019)
Supplement: pnas.1703764114.sapp.pdf [file pnas.1703764114.sapp.pdf]

Supporting information for  
LARGE NUMBERS OF EXPLANATORY VARIABLES: AN EXPLORATION

D. R. Cox

*Nuffield College, Oxford OX1 1NF, U.K.*

and

H. S. Battey

*Imperial College London, SW7 2AZ, U.K.*

Tables S1-S15 below specify all models of reasonable dimension whose fit is not significantly worse than that of the the model fit to all 17 retained candidate variables in Table 1, where significance is measured using an  $F$  test at the 1% level. For typographical reasons, variables are recoded as: 1=7235, 2=11642, 3=25125, 4=25470, 5=25744, 6=27642, 7=27920, 8=29679, 9=33385, 10=36409, 11=37443, 12=44276, 13=45991, 14=46771, 15=48415, 16=48433, 17=48549, 18=interaction between 27642 and 7235, 19=interaction between 25744 and 25125, 20=interaction between 27920 and 27642, 21=interaction between 27642 and 44276.

Tables S16-S22 summarize some of the information contained in Tables S1-S15.

| Model | Recoded variable indices |    |   |   |    |   |   |    |    |    |    |    |    |    |    |    |   |    |   |  |
|-------|--------------------------|----|---|---|----|---|---|----|----|----|----|----|----|----|----|----|---|----|---|--|
| 1     | 1                        | 16 | 3 | 8 | -  | 5 | - | 19 | -  | -  | -  | -  | -  | -  | -  | -  | - | -  | - |  |
| 2     | 1                        | 16 | 3 | 8 | -  | 5 | - | 19 | -  | -  | -  | -  | -  | -  | -  | -  | - | -  | 2 |  |
| 3     | 1                        | 16 | 3 | 8 | -  | - | - | -  | 10 | -  | -  | -  | -  | -  | -  | -  | - | 4  | - |  |
| 4     | 1                        | 16 | 3 | 8 | -  | 5 | - | 19 | -  | -  | -  | -  | -  | -  | -  | -  | - | 4  | - |  |
| 5     | 1                        | 16 | 3 | 8 | -  | 5 | - | -  | 10 | -  | -  | -  | -  | -  | -  | -  | - | -  | - |  |
| 6     | 1                        | 16 | 3 | 8 | -  | 5 | - | 19 | -  | -  | -  | -  | -  | -  | -  | -  | - | -  | - |  |
| 7     | 1                        | 16 | 3 | - | 15 | 5 | - | -  | 10 | -  | -  | -  | -  | -  | -  | -  | - | -  | - |  |
| 8     | 1                        | 16 | 3 | 8 | -  | 5 | 6 | 19 | -  | -  | -  | -  | -  | -  | -  | -  | - | -  | - |  |
| 9     | 1                        | 16 | 3 | 8 | -  | 5 | - | 19 | -  | -  | -  | -  | -  | -  | -  | -  | 7 | -  | - |  |
| 10    | 1                        | 16 | 3 | 8 | -  | 5 | - | 19 | -  | -  | -  | 9  | -  | -  | -  | -  | - | -  | - |  |
| 11    | 1                        | 16 | 3 | 8 | -  | 5 | - | 19 | -  | 10 | -  | -  | -  | -  | -  | -  | - | -  | - |  |
| 12    | 1                        | 16 | 3 | 8 | -  | - | 6 | -  | 10 | -  | 12 | -  | -  | -  | 21 | -  | - | -  | - |  |
| 13    | 1                        | 16 | 3 | 8 | -  | 5 | - | 19 | -  | -  | -  | -  | -  | 11 | -  | -  | - | -  | - |  |
| 14    | 1                        | 16 | 3 | 8 | -  | 5 | - | 19 | -  | -  | -  | 12 | -  | -  | -  | -  | - | -  | - |  |
| 15    | 1                        | 16 | 3 | 8 | -  | 5 | - | 19 | 13 | -  | -  | -  | -  | -  | -  | -  | - | -  | - |  |
| 16    | 1                        | 16 | 3 | 8 | -  | 5 | - | 19 | -  | -  | -  | -  | -  | -  | -  | 14 | - | -  | - |  |
| 17    | 1                        | 16 | 3 | 8 | 15 | 5 | - | 19 | -  | -  | -  | -  | -  | -  | -  | -  | - | -  | - |  |
| 18    | 1                        | 16 | 3 | 8 | -  | 5 | - | 19 | -  | -  | 17 | -  | -  | -  | -  | -  | - | -  | - |  |
| 19    | 1                        | 16 | 3 | 8 | -  | 5 | 6 | 19 | -  | -  | -  | -  | 18 | -  | -  | -  | - | -  | - |  |
| 20    | 1                        | 16 | 3 | 8 | -  | 5 | 6 | 19 | -  | -  | -  | -  | -  | -  | -  | 7  | - | 20 | - |  |
| 21    | 1                        | 16 | 3 | 8 | -  | 5 | 6 | 19 | -  | -  | -  | 12 | -  | -  | 21 | -  | - | -  | - |  |
| 22    | 1                        | 16 | 3 | - | 15 | 5 | - | 19 | -  | -  | -  | 9  | -  | -  | -  | -  | - | -  | - |  |
| 23    | 1                        | 16 | 3 | - | 15 | - | - | -  | 10 | -  | -  | -  | -  | 11 | -  | -  | - | -  | - |  |
| 24    | 1                        | 16 | 3 | - | 15 | 5 | - | 19 | -  | 10 | -  | -  | -  | -  | -  | -  | - | -  | - |  |
| 25    | 1                        | 16 | 3 | - | 15 | 5 | - | 19 | -  | -  | -  | -  | -  | -  | -  | 14 | - | -  | - |  |
| 26    | 1                        | 16 | - | 8 | 15 | 5 | - | -  | -  | -  | -  | 9  | -  | -  | -  | -  | - | -  | - |  |
| 27    | 1                        | 16 | - | 8 | 15 | - | - | -  | -  | -  | -  | 9  | -  | 11 | -  | -  | - | -  | - |  |
| 28    | 1                        | 16 | - | 8 | 15 | - | - | -  | 13 | -  | -  | -  | 9  | -  | -  | -  | - | -  | - |  |
| 29    | 1                        | 16 | 3 | 8 | -  | 5 | - | 19 | 13 | -  | -  | -  | 9  | -  | -  | -  | - | -  | - |  |
| 30    | 1                        | 16 | - | 8 | 15 | - | - | -  | 10 | -  | -  | -  | -  | 11 | -  | -  | - | -  | - |  |
| 31    | 1                        | 16 | - | 8 | 15 | - | - | -  | -  | -  | -  | -  | -  | 11 | -  | 14 | - | -  | - |  |
| 32    | 1                        | 16 | - | - | 15 | - | - | -  | 13 | 10 | -  | -  | 9  | -  | -  | -  | - | -  | - |  |
| 33    | 1                        | 16 | 3 | - | 15 | - | 6 | -  | 13 | -  | -  | 12 | -  | 18 | -  | 21 | - | -  | - |  |
| 34    | 1                        | 16 | 3 | - | 15 | 5 | 6 | 19 | -  | -  | -  | 12 | -  | 18 | -  | 21 | - | -  | - |  |
| 35    | 1                        | 16 | - | 8 | 15 | 5 | 6 | -  | -  | 17 | -  | -  | 18 | -  | -  | -  | - | -  | - |  |
| 36    | 1                        | 16 | - | 8 | 15 | - | 6 | -  | 13 | -  | -  | -  | 9  | 18 | -  | -  | - | -  | - |  |
| 37    | 1                        | 16 | 3 | 8 | -  | - | - | -  | 10 | -  | -  | -  | -  | -  | -  | -  | - | 4  | 2 |  |
| 38    | 1                        | 16 | 3 | 8 | -  | 5 | - | 19 | -  | -  | -  | -  | -  | -  | -  | -  | - | 4  | 2 |  |
| 39    | 1                        | 16 | 3 | - | -  | 5 | - | -  | -  | -  | -  | 9  | -  | -  | -  | -  | 7 | -  | 2 |  |
| 40    | 1                        | 16 | 3 | - | -  | 5 | - | -  | 10 | -  | -  | -  | -  | -  | -  | -  | 7 | -  | 2 |  |
| 41    | 1                        | 16 | 3 | 8 | -  | 5 | - | -  | 10 | -  | -  | -  | -  | -  | -  | -  | - | -  | 2 |  |
| 42    | 1                        | 16 | 3 | 8 | -  | 5 | - | -  | 13 | -  | -  | -  | -  | -  | -  | -  | - | -  | 2 |  |
| 43    | 1                        | 16 | 3 | 8 | -  | 5 | - | 19 | -  | -  | -  | -  | -  | -  | -  | -  | - | -  | 2 |  |
| 44    | 1                        | 16 | 3 | - | 15 | 5 | - | -  | 10 | -  | -  | -  | -  | -  | -  | -  | - | -  | 2 |  |
| 45    | 1                        | 16 | 3 | - | -  | 5 | - | -  | 13 | -  | 17 | -  | -  | -  | -  | -  | - | -  | 2 |  |
| 46    | 1                        | 16 | 3 | 8 | -  | 5 | 6 | 19 | -  | -  | -  | -  | -  | -  | -  | -  | - | -  | 2 |  |
| 47    | 1                        | 16 | 3 | 8 | -  | 5 | - | 19 | -  | -  | -  | -  | -  | -  | -  | -  | 7 | -  | 2 |  |
| 48    | 1                        | 16 | 3 | - | -  | 5 | - | 19 | -  | -  | -  | 9  | -  | -  | -  | -  | 7 | -  | 2 |  |
| 49    | 1                        | 16 | 3 | - | -  | 5 | - | 19 | -  | 10 | -  | -  | -  | -  | -  | -  | 7 | -  | 2 |  |
| 50    | 1                        | 16 | 3 | - | -  | 5 | - | 19 | 13 | -  | -  | -  | -  | -  | -  | -  | 7 | -  | 2 |  |

Table S1: Models of reasonable dimension whose fit is not significantly worse than the model fit to the 21 retained candidate variables. Significance is measured using an  $F$  test at the 1% level.

| Model | Recoded variable indices |    |   |   |    |   |   |    |    |    |    |    |   |    |    |    |    |   |    |    |   |
|-------|--------------------------|----|---|---|----|---|---|----|----|----|----|----|---|----|----|----|----|---|----|----|---|
| 51    | 1                        | 16 | 3 | 8 | -  | - | - | -  | 13 | -  | -  | -  | 9 | -  | -  | -  | -  | - | 2  |    |   |
| 52    | 1                        | 16 | 3 | 8 | -  | 5 | - | 19 | -  | -  | -  | -  | 9 | -  | -  | -  | -  | - | 2  |    |   |
| 53    | 1                        | 16 | 3 | 8 | -  | - | - | -  | -  | 10 | -  | -  | - | -  | 11 | -  | -  | - | 2  |    |   |
| 54    | 1                        | 16 | 3 | 8 | -  | 5 | - | 19 | -  | 10 | -  | -  | - | -  | -  | -  | -  | - | 2  |    |   |
| 55    | 1                        | 16 | 3 | 8 | -  | - | 6 | -  | -  | 10 | -  | 12 | - | -  | -  | 21 | -  | - | 2  |    |   |
| 56    | 1                        | 16 | 3 | 8 | -  | - | - | -  | 13 | -  | -  | -  | - | -  | 11 | -  | -  | - | 2  |    |   |
| 57    | 1                        | 16 | 3 | 8 | -  | 5 | - | 19 | -  | -  | -  | -  | - | -  | 11 | -  | -  | - | 2  |    |   |
| 58    | 1                        | 16 | 3 | 8 | -  | 5 | - | 19 | -  | -  | -  | 12 | - | -  | -  | -  | -  | - | 2  |    |   |
| 59    | 1                        | 16 | 3 | 8 | -  | 5 | - | 19 | 13 | -  | -  | -  | - | -  | -  | -  | -  | - | 2  |    |   |
| 60    | 1                        | 16 | 3 | 8 | -  | 5 | - | 19 | -  | -  | -  | -  | - | -  | -  | -  | 14 | - | 2  |    |   |
| 61    | 1                        | 16 | 3 | 8 | 15 | 5 | - | 19 | -  | -  | -  | -  | - | -  | -  | -  | -  | - | 2  |    |   |
| 62    | 1                        | 16 | 3 | 8 | -  | 5 | - | 19 | -  | -  | 17 | -  | - | -  | -  | -  | -  | - | 2  |    |   |
| 63    | 1                        | 16 | 3 | 8 | -  | 5 | 6 | 19 | -  | -  | -  | -  | - | 18 | -  | -  | -  | - | 2  |    |   |
| 64    | 1                        | 16 | 3 | 8 | -  | 5 | 6 | 19 | -  | -  | -  | -  | - | -  | -  | -  | 7  | - | 20 | 2  |   |
| 65    | 1                        | 16 | 3 | 8 | -  | 5 | 6 | 19 | -  | -  | -  | 12 | - | -  | -  | 21 | -  | - | -  | 2  |   |
| 66    | 1                        | 16 | 3 | - | 15 | 5 | - | 19 | -  | -  | -  | -  | 9 | -  | -  | -  | -  | - | -  | 2  |   |
| 67    | 1                        | 16 | 3 | - | 15 | - | - | -  | -  | 10 | -  | -  | - | -  | 11 | -  | -  | - | -  | 2  |   |
| 68    | 1                        | 16 | 3 | - | -  | 5 | - | 19 | -  | 10 | -  | -  | - | -  | 11 | -  | -  | - | -  | 2  |   |
| 69    | 1                        | 16 | 3 | - | 15 | 5 | - | 19 | -  | 10 | -  | -  | - | -  | -  | -  | -  | - | -  | 2  |   |
| 70    | 1                        | 16 | 3 | - | 15 | - | - | -  | -  | -  | -  | -  | - | -  | 11 | -  | 14 | - | -  | 2  |   |
| 71    | 1                        | 16 | 3 | - | 15 | - | - | -  | 13 | -  | -  | -  | - | -  | -  | -  | 14 | - | -  | 2  |   |
| 72    | 1                        | 16 | 3 | - | 15 | 5 | - | 19 | -  | -  | -  | -  | - | -  | -  | -  | 14 | - | -  | 2  |   |
| 73    | 1                        | -  | - | - | 15 | - | 6 | -  | -  | 10 | 17 | -  | - | -  | -  | -  | -  | 7 | 4  | 20 | 2 |
| 74    | 1                        | 16 | - | 8 | 15 | 5 | - | -  | -  | -  | -  | -  | 9 | -  | -  | -  | -  | - | -  | 2  |   |
| 75    | 1                        | 16 | - | 8 | 15 | - | - | -  | -  | -  | -  | -  | 9 | -  | 11 | -  | -  | - | -  | 2  |   |
| 76    | 1                        | 16 | - | 8 | 15 | - | - | -  | 13 | -  | -  | -  | 9 | -  | -  | -  | -  | - | -  | 2  |   |
| 77    | 1                        | 16 | 3 | 8 | -  | 5 | - | 19 | 13 | -  | -  | -  | 9 | -  | -  | -  | -  | - | -  | 2  |   |
| 78    | 1                        | 16 | 3 | 8 | 15 | 5 | - | 19 | -  | -  | -  | -  | 9 | -  | -  | -  | -  | - | -  | 2  |   |
| 79    | 1                        | 16 | - | 8 | 15 | - | - | -  | -  | 10 | -  | -  | - | -  | 11 | -  | -  | - | -  | 2  |   |
| 80    | 1                        | 16 | - | 8 | 15 | - | - | -  | 13 | 10 | -  | -  | - | -  | -  | -  | -  | - | -  | 2  |   |
| 81    | 1                        | 16 | - | 8 | 15 | - | - | -  | -  | -  | -  | -  | - | -  | 11 | -  | 14 | - | -  | 2  |   |
| 82    | 1                        | 16 | 3 | 8 | -  | 5 | - | -  | -  | 10 | -  | -  | - | -  | -  | -  | -  | - | 4  | -  | - |
| 83    | 1                        | 16 | 3 | 8 | -  | 5 | - | 19 | -  | -  | -  | -  | - | -  | -  | -  | -  | - | 4  | -  | - |
| 84    | 1                        | 16 | 3 | - | 15 | 5 | - | -  | -  | 10 | -  | -  | - | -  | -  | -  | -  | - | 4  | -  | - |
| 85    | 1                        | 16 | 3 | - | -  | - | 6 | -  | -  | 10 | -  | -  | - | -  | -  | -  | -  | 7 | 4  | -  | - |
| 86    | 1                        | 16 | 3 | 8 | -  | - | 6 | -  | -  | 10 | -  | -  | - | -  | -  | -  | -  | - | 4  | -  | - |
| 87    | 1                        | 16 | 3 | 8 | -  | 5 | 6 | 19 | -  | -  | -  | -  | - | -  | -  | -  | -  | - | 4  | -  | - |
| 88    | 1                        | -  | 3 | - | 15 | - | 6 | -  | -  | -  | 17 | -  | 9 | -  | -  | -  | -  | - | 4  | -  | - |
| 89    | 1                        | 16 | 3 | - | -  | - | 6 | -  | -  | 10 | -  | -  | - | -  | 11 | -  | -  | - | 4  | -  | - |
| 90    | 1                        | -  | 3 | - | -  | - | 6 | -  | -  | 10 | 17 | 12 | - | -  | -  | -  | -  | - | 4  | -  | - |
| 91    | 1                        | 16 | 3 | - | -  | - | 6 | -  | 13 | 10 | -  | -  | - | -  | -  | -  | -  | - | 4  | -  | - |
| 92    | 1                        | 16 | 3 | - | 15 | - | 6 | -  | -  | 10 | -  | -  | - | -  | -  | -  | -  | - | 4  | -  | - |
| 93    | 1                        | -  | 3 | - | 15 | - | 6 | -  | -  | 10 | 17 | -  | - | -  | -  | -  | -  | - | 4  | -  | - |
| 94    | 1                        | 16 | 3 | - | -  | - | 6 | -  | -  | 10 | 17 | -  | - | -  | -  | -  | -  | - | 4  | -  | - |
| 95    | 1                        | 16 | 3 | - | -  | - | 6 | -  | -  | 10 | -  | -  | - | 18 | -  | -  | -  | - | 4  | -  | - |
| 96    | 1                        | 16 | 3 | - | -  | 5 | 6 | 19 | -  | 10 | -  | -  | - | -  | -  | -  | -  | - | 4  | -  | - |
| 97    | 1                        | 16 | 3 | - | -  | - | 6 | -  | -  | 10 | -  | 12 | - | -  | -  | 21 | -  | - | 4  | -  | - |
| 98    | 1                        | 16 | 3 | - | -  | - | 6 | -  | 13 | -  | 17 | -  | - | -  | -  | -  | -  | - | 4  | -  | - |
| 99    | 1                        | 16 | 3 | - | -  | - | 6 | -  | 13 | -  | -  | 12 | - | -  | -  | 21 | -  | - | 4  | -  | - |
| 100   | 1                        | 16 | 3 | 8 | -  | - | - | -  | -  | 10 | -  | -  | - | -  | -  | -  | -  | 7 | 4  | -  | - |

Table S2: Continuation of table S1.

| Model | Recoded variable indices |    |   |   |    |   |   |    |    |    |    |    |   |    |    |    |    |   |   |    |   |
|-------|--------------------------|----|---|---|----|---|---|----|----|----|----|----|---|----|----|----|----|---|---|----|---|
| 101   | 1                        | 16 | 3 | 8 | -  | 5 | - | 19 | -  | -  | -  | -  | - | -  | -  | 7  | 4  | - | - |    |   |
| 102   | 1                        | 16 | 3 | 8 | -  | - | - | -  | -  | 10 | -  | -  | 9 | -  | -  | -  | -  | 4 | - | -  |   |
| 103   | 1                        | 16 | 3 | 8 | -  | - | - | -  | 13 | -  | -  | -  | 9 | -  | -  | -  | -  | 4 | - | -  |   |
| 104   | 1                        | 16 | 3 | 8 | 15 | - | - | -  | -  | -  | -  | -  | 9 | -  | -  | -  | -  | 4 | - | -  |   |
| 105   | 1                        | -  | 3 | 8 | 15 | - | - | -  | -  | -  | 17 | -  | 9 | -  | -  | -  | -  | 4 | - | -  |   |
| 106   | 1                        | 16 | 3 | 8 | -  | 5 | - | 19 | -  | -  | -  | -  | 9 | -  | -  | -  | -  | 4 | - | -  |   |
| 107   | 1                        | 16 | 3 | 8 | -  | - | - | -  | -  | 10 | -  | -  | - | -  | 11 | -  | -  | - | 4 | -  | - |
| 108   | 1                        | 16 | 3 | 8 | -  | - | - | -  | -  | 10 | -  | 12 | - | -  | -  | -  | -  | 4 | - | -  |   |
| 109   | 1                        | 16 | 3 | 8 | -  | - | - | -  | 13 | 10 | -  | -  | - | -  | -  | -  | -  | 4 | - | -  |   |
| 110   | 1                        | 16 | 3 | 8 | -  | - | - | -  | -  | 10 | -  | -  | - | -  | -  | -  | 14 | - | 4 | -  | - |
| 111   | 1                        | 16 | 3 | 8 | 15 | - | - | -  | -  | 10 | -  | -  | - | -  | -  | -  | -  | - | 4 | -  | - |
| 112   | 1                        | -  | 3 | 8 | 15 | - | - | -  | -  | 10 | 17 | -  | - | -  | -  | -  | -  | - | 4 | -  | - |
| 113   | 1                        | 16 | 3 | 8 | -  | - | - | -  | -  | 10 | 17 | -  | - | -  | -  | -  | -  | - | 4 | -  | - |
| 114   | 1                        | 16 | 3 | 8 | -  | - | 6 | -  | -  | 10 | -  | -  | - | 18 | -  | -  | -  | - | 4 | -  | - |
| 115   | 1                        | 16 | 3 | 8 | -  | 5 | - | 19 | -  | 10 | -  | -  | - | -  | -  | -  | -  | - | 4 | -  | - |
| 116   | 1                        | 16 | 3 | 8 | -  | - | 6 | -  | -  | 10 | -  | -  | - | -  | -  | -  | -  | 7 | 4 | 20 | - |
| 117   | 1                        | 16 | 3 | 8 | -  | - | 6 | -  | -  | 10 | -  | 12 | - | -  | -  | 21 | -  | - | 4 | -  | - |
| 118   | 1                        | -  | 3 | 8 | 15 | - | - | -  | -  | -  | 17 | -  | - | -  | 11 | -  | -  | - | 4 | -  | - |
| 119   | 1                        | 16 | 3 | 8 | -  | 5 | - | 19 | -  | -  | -  | -  | - | -  | 11 | -  | -  | - | 4 | -  | - |
| 120   | 1                        | 16 | 3 | 8 | -  | 5 | - | 19 | -  | -  | -  | 12 | - | -  | -  | -  | -  | - | 4 | -  | - |
| 121   | 1                        | 16 | 3 | 8 | -  | 5 | - | 19 | 13 | -  | -  | -  | - | -  | -  | -  | -  | - | 4 | -  | - |
| 122   | 1                        | 16 | 3 | 8 | -  | - | 6 | -  | 13 | -  | -  | 12 | - | -  | -  | 21 | -  | - | 4 | -  | - |
| 123   | 1                        | 16 | 3 | 8 | -  | 5 | - | 19 | -  | -  | -  | -  | - | -  | -  | -  | 14 | - | 4 | -  | - |
| 124   | 1                        | 16 | 3 | 8 | 15 | 5 | - | 19 | -  | -  | -  | -  | - | -  | -  | -  | -  | - | 4 | -  | - |
| 125   | 1                        | 16 | 3 | 8 | -  | 5 | - | 19 | -  | -  | 17 | -  | - | -  | -  | -  | -  | - | 4 | -  | - |
| 126   | 1                        | 16 | 3 | 8 | -  | 5 | 6 | 19 | -  | -  | -  | -  | - | 18 | -  | -  | -  | - | 4 | -  | - |
| 127   | 1                        | 16 | 3 | 8 | -  | 5 | 6 | 19 | -  | -  | -  | -  | - | -  | -  | -  | -  | 7 | 4 | 20 | - |
| 128   | 1                        | 16 | 3 | 8 | -  | 5 | 6 | 19 | -  | -  | -  | 12 | - | -  | -  | 21 | -  | - | 4 | -  | - |
| 129   | 1                        | 16 | 3 | - | 15 | 5 | - | 19 | -  | -  | -  | -  | 9 | -  | -  | -  | -  | - | 4 | -  | - |
| 130   | 1                        | 16 | 3 | - | 15 | - | - | -  | -  | 10 | -  | -  | - | -  | 11 | -  | -  | - | 4 | -  | - |
| 131   | 1                        | -  | 3 | - | 15 | - | - | -  | -  | 10 | 17 | 12 | - | -  | -  | -  | -  | - | 4 | -  | - |
| 132   | 1                        | 16 | 3 | - | 15 | - | - | -  | 13 | 10 | -  | -  | - | -  | -  | -  | -  | - | 4 | -  | - |
| 133   | 1                        | 16 | 3 | - | 15 | 5 | - | 19 | -  | 10 | -  | -  | - | -  | -  | -  | -  | - | 4 | -  | - |
| 134   | 1                        | 16 | 3 | - | 15 | - | 6 | -  | -  | 10 | -  | -  | - | -  | -  | -  | -  | 7 | 4 | 20 | - |
| 135   | 1                        | -  | 3 | - | 15 | - | 6 | -  | -  | 10 | 17 | -  | - | -  | -  | -  | -  | 7 | 4 | 20 | - |
| 136   | 1                        | 16 | 3 | - | 15 | - | - | -  | -  | -  | -  | -  | - | -  | 11 | -  | 14 | - | 4 | -  | - |
| 137   | 1                        | 16 | 3 | - | 15 | - | - | -  | 13 | -  | 17 | -  | - | -  | -  | -  | -  | - | 4 | -  | - |
| 138   | 1                        | 16 | 3 | - | 15 | - | 6 | -  | 13 | -  | -  | 12 | - | -  | -  | 21 | -  | - | 4 | -  | - |
| 139   | 1                        | 16 | 3 | - | 15 | 5 | - | 19 | -  | -  | -  | -  | - | -  | -  | -  | 14 | - | 4 | -  | - |
| 140   | 1                        | 16 | 3 | 8 | -  | 5 | 6 | -  | -  | 10 | -  | -  | - | -  | -  | -  | -  | - | - | -  | - |
| 141   | 1                        | 16 | 3 | 8 | -  | 5 | 6 | 19 | -  | -  | -  | -  | - | -  | -  | -  | -  | - | - | -  | - |
| 142   | 1                        | 16 | 3 | - | -  | 5 | 6 | -  | -  | 10 | -  | -  | - | -  | 11 | -  | -  | - | - | -  | - |
| 143   | 1                        | 16 | 3 | - | -  | 5 | 6 | -  | 13 | 10 | -  | -  | - | -  | -  | -  | -  | - | - | -  | - |
| 144   | 1                        | 16 | 3 | - | 15 | 5 | 6 | -  | -  | 10 | -  | -  | - | -  | -  | -  | -  | - | - | -  | - |
| 145   | 1                        | 16 | 3 | - | -  | 5 | 6 | 19 | -  | -  | -  | -  | - | -  | 11 | -  | -  | - | - | -  | - |
| 146   | 1                        | 16 | 3 | - | -  | 5 | 6 | -  | 13 | -  | 17 | -  | - | -  | -  | -  | -  | - | - | -  | - |
| 147   | 1                        | 16 | 3 | - | -  | 5 | 6 | -  | 13 | -  | -  | 12 | - | -  | -  | 21 | -  | - | - | -  | - |
| 148   | 1                        | 16 | 3 | 8 | -  | 5 | - | -  | -  | -  | -  | -  | 9 | -  | -  | -  | -  | - | 7 | -  | - |
| 149   | 1                        | 16 | 3 | 8 | -  | 5 | - | -  | -  | 10 | -  | -  | - | -  | -  | -  | -  | - | 7 | -  | - |
| 150   | 1                        | 16 | 3 | 8 | -  | 5 | - | 19 | -  | -  | -  | -  | - | -  | -  | -  | -  | - | 7 | -  | - |

Table S3: Continuation of table S2.

| Model | Recoded variable indices |    |   |   |    |   |   |    |    |    |    |    |   |    |    |    |    |    |
|-------|--------------------------|----|---|---|----|---|---|----|----|----|----|----|---|----|----|----|----|----|
| 151   | 1                        | 16 | 3 | 8 | -  | 5 | 6 | -  | -  | -  | -  | -  | - | -  | -  | 7  | 20 | -  |
| 152   | 1                        | 16 | 3 | - | 15 | 5 | - | -  | -  | 10 | -  | -  | - | -  | -  | 7  | -  | -  |
| 153   | 1                        | 16 | 3 | 8 | -  | 5 | - | -  | -  | 10 | -  | -  | 9 | -  | -  | -  | -  | -  |
| 154   | 1                        | 16 | 3 | 8 | -  | 5 | - | -  | -  | -  | -  | 12 | 9 | -  | -  | -  | -  | -  |
| 155   | 1                        | 16 | 3 | 8 | -  | 5 | - | -  | 13 | -  | -  | -  | 9 | -  | -  | -  | -  | -  |
| 156   | 1                        | 16 | 3 | 8 | -  | 5 | - | -  | -  | -  | -  | -  | 9 | -  | -  | 14 | -  | -  |
| 157   | 1                        | 16 | 3 | 8 | 15 | 5 | - | -  | -  | -  | -  | -  | 9 | -  | -  | -  | -  | -  |
| 158   | 1                        | 16 | 3 | 8 | -  | 5 | - | -  | -  | -  | 17 | -  | 9 | -  | -  | -  | -  | -  |
| 159   | 1                        | 16 | 3 | 8 | -  | 5 | 6 | -  | -  | -  | -  | -  | 9 | 18 | -  | -  | -  | -  |
| 160   | 1                        | 16 | 3 | 8 | -  | 5 | - | 19 | -  | -  | -  | -  | 9 | -  | -  | -  | -  | -  |
| 161   | 1                        | -  | 3 | 8 | 15 | 5 | - | -  | -  | 10 | -  | -  | - | -  | 11 | -  | -  | -  |
| 162   | 1                        | 16 | 3 | 8 | -  | 5 | - | -  | -  | 10 | -  | -  | - | -  | 11 | -  | -  | -  |
| 163   | 1                        | 16 | 3 | 8 | -  | 5 | - | -  | -  | 10 | -  | 12 | - | -  | -  | -  | -  | -  |
| 164   | 1                        | 16 | 3 | 8 | -  | 5 | - | -  | 13 | 10 | -  | -  | - | -  | -  | -  | -  | -  |
| 165   | 1                        | 16 | 3 | 8 | -  | 5 | - | -  | -  | 10 | -  | -  | - | -  | -  | 14 | -  | -  |
| 166   | 1                        | 16 | 3 | 8 | 15 | 5 | - | -  | -  | 10 | -  | -  | - | -  | -  | -  | -  | -  |
| 167   | 1                        | 16 | 3 | 8 | -  | 5 | - | -  | -  | 10 | 17 | -  | - | -  | -  | -  | -  | -  |
| 168   | 1                        | 16 | 3 | 8 | -  | 5 | 6 | -  | -  | 10 | -  | -  | - | 18 | -  | -  | -  | -  |
| 169   | 1                        | 16 | 3 | 8 | -  | 5 | - | 19 | -  | 10 | -  | -  | - | -  | -  | -  | -  | -  |
| 170   | 1                        | 16 | 3 | 8 | -  | 5 | 6 | -  | -  | 10 | -  | -  | - | -  | -  | 7  | 20 | -  |
| 171   | 1                        | 16 | 3 | 8 | -  | 5 | 6 | -  | -  | 10 | -  | 12 | - | -  | -  | 21 | -  | -  |
| 172   | 1                        | -  | 3 | 8 | 15 | 5 | - | -  | -  | -  | -  | -  | - | -  | 11 | -  | 14 | -  |
| 173   | 1                        | 16 | 3 | 8 | -  | 5 | - | 19 | -  | -  | -  | -  | - | -  | 11 | -  | -  | -  |
| 174   | 1                        | 16 | 3 | 8 | -  | 5 | - | 19 | -  | -  | -  | 12 | - | -  | -  | -  | -  | -  |
| 175   | 1                        | 16 | 3 | 8 | -  | 5 | - | -  | 13 | -  | -  | -  | - | -  | -  | 14 | -  | -  |
| 176   | 1                        | 16 | 3 | 8 | -  | 5 | - | -  | 13 | -  | 17 | -  | - | -  | -  | -  | -  | -  |
| 177   | 1                        | 16 | 3 | 8 | -  | 5 | 6 | -  | 13 | -  | -  | -  | - | 18 | -  | -  | -  | -  |
| 178   | 1                        | 16 | 3 | 8 | -  | 5 | - | 19 | 13 | -  | -  | -  | - | -  | -  | -  | -  | -  |
| 179   | 1                        | 16 | 3 | 8 | -  | 5 | 6 | -  | 13 | -  | -  | 12 | - | -  | -  | 21 | -  | -  |
| 180   | 1                        | 16 | 3 | 8 | -  | 5 | - | 19 | -  | -  | -  | -  | - | -  | -  | 14 | -  | -  |
| 181   | 1                        | 16 | 3 | 8 | 15 | 5 | - | -  | -  | -  | 17 | -  | - | -  | -  | -  | -  | -  |
| 182   | 1                        | 16 | 3 | 8 | 15 | 5 | - | 19 | -  | -  | -  | -  | - | -  | -  | -  | -  | -  |
| 183   | 1                        | 16 | 3 | 8 | 15 | 5 | 6 | -  | -  | -  | -  | 12 | - | -  | -  | 21 | -  | -  |
| 184   | 1                        | 16 | 3 | 8 | -  | 5 | - | 19 | -  | -  | 17 | -  | - | -  | -  | -  | -  | -  |
| 185   | 1                        | 16 | 3 | 8 | -  | 5 | 6 | 19 | -  | -  | -  | -  | - | 18 | -  | -  | -  | -  |
| 186   | 1                        | 16 | 3 | 8 | -  | 5 | 6 | 19 | -  | -  | -  | -  | - | -  | -  | -  | 7  | 20 |
| 187   | 1                        | 16 | 3 | 8 | -  | 5 | 6 | 19 | -  | -  | -  | 12 | - | -  | -  | 21 | -  | -  |
| 188   | 1                        | 16 | 3 | - | 15 | 5 | - | -  | -  | 10 | -  | -  | 9 | -  | -  | -  | -  | -  |
| 189   | 1                        | 16 | 3 | - | 15 | 5 | - | -  | 13 | -  | -  | -  | 9 | -  | -  | -  | -  | -  |
| 190   | 1                        | 16 | 3 | - | -  | 5 | - | -  | 13 | -  | 17 | -  | 9 | -  | -  | -  | -  | -  |
| 191   | 1                        | 16 | 3 | - | 15 | 5 | - | -  | -  | -  | 17 | -  | 9 | -  | -  | -  | -  | -  |
| 192   | 1                        | 16 | 3 | - | 15 | 5 | - | 19 | -  | -  | -  | -  | 9 | -  | -  | -  | -  | -  |
| 193   | 1                        | 16 | 3 | - | 15 | 5 | 6 | -  | -  | -  | -  | 12 | 9 | -  | -  | 21 | -  | -  |
| 194   | 1                        | 16 | 3 | - | 15 | 5 | - | -  | -  | 10 | -  | -  | - | -  | 11 | -  | -  | -  |
| 195   | 1                        | 16 | 3 | - | 15 | 5 | - | -  | -  | 10 | -  | 12 | - | -  | -  | -  | -  | -  |
| 196   | 1                        | 16 | 3 | - | 15 | 5 | - | -  | 13 | 10 | -  | -  | - | -  | -  | -  | -  | -  |
| 197   | 1                        | 16 | 3 | - | -  | 5 | - | -  | 13 | 10 | 17 | -  | - | -  | -  | -  | -  | -  |
| 198   | 1                        | 16 | 3 | - | -  | 5 | - | 19 | 13 | 10 | -  | -  | - | -  | -  | -  | -  | -  |
| 199   | 1                        | 16 | 3 | - | 15 | 5 | - | -  | -  | 10 | -  | -  | - | -  | -  | 14 | -  | -  |
| 200   | 1                        | 16 | 3 | - | 15 | 5 | - | -  | -  | 10 | 17 | -  | - | -  | -  | -  | -  | -  |

Table S4: Continuation of table S3.

| Model | Recoded variable indices |    |   |   |    |   |   |    |    |    |    |    |   |    |    |    |    |   |    |
|-------|--------------------------|----|---|---|----|---|---|----|----|----|----|----|---|----|----|----|----|---|----|
| 201   | 1                        | 16 | 3 | - | 15 | 5 | 6 | -  | -  | 10 | -  | -  | - | 18 | -  | -  | -  | - | -  |
| 202   | 1                        | 16 | 3 | - | 15 | 5 | - | 19 | -  | 10 | -  | -  | - | -  | -  | -  | -  | - | -  |
| 203   | 1                        | 16 | 3 | - | 15 | 5 | 6 | -  | -  | 10 | -  | -  | - | -  | -  | -  | 7  | - | 20 |
| 204   | 1                        | 16 | 3 | - | 15 | 5 | 6 | -  | -  | 10 | -  | 12 | - | -  | -  | 21 | -  | - | -  |
| 205   | 1                        | 16 | 3 | - | -  | 5 | 6 | -  | -  | 10 | -  | -  | - | 18 | -  | -  | -  | 7 | -  |
| 206   | 1                        | 16 | 3 | - | 15 | 5 | - | -  | 13 | -  | 17 | -  | - | -  | -  | -  | -  | - | -  |
| 207   | 1                        | 16 | 3 | - | 15 | 5 | 6 | -  | 13 | -  | -  | 12 | - | -  | -  | 21 | -  | - | -  |
| 208   | 1                        | 16 | 3 | - | -  | 5 | 6 | -  | 13 | -  | -  | 12 | - | -  | -  | 21 | -  | 7 | -  |
| 209   | 1                        | 16 | 3 | - | 15 | 5 | - | 19 | -  | -  | -  | -  | - | -  | -  | -  | 14 | - | -  |
| 210   | 1                        | 16 | 3 | - | 15 | 5 | 6 | -  | -  | -  | -  | 12 | - | 18 | -  | 21 | -  | - | -  |
| 211   | 1                        | 16 | 3 | 8 | -  | 5 | 6 | 19 | -  | -  | -  | -  | - | -  | -  | -  | -  | 7 | -  |
| 212   | 1                        | 16 | 3 | - | -  | 5 | 6 | 19 | -  | -  | -  | -  | 9 | -  | -  | -  | -  | 7 | -  |
| 213   | 1                        | 16 | 3 | - | -  | 5 | 6 | 19 | -  | -  | -  | -  | - | -  | -  | -  | 14 | 7 | -  |
| 214   | 1                        | 16 | 3 | - | -  | 5 | 6 | 19 | -  | -  | -  | 12 | - | -  | -  | 21 | -  | 7 | -  |
| 215   | 1                        | 16 | 3 | 8 | -  | 5 | 6 | 19 | -  | -  | -  | -  | 9 | -  | -  | -  | -  | - | -  |
| 216   | 1                        | -  | 3 | 8 | 15 | - | 6 | -  | -  | 10 | -  | -  | - | -  | 11 | -  | -  | - | -  |
| 217   | 1                        | 16 | 3 | 8 | -  | - | 6 | -  | -  | 10 | -  | -  | - | -  | 11 | -  | -  | - | -  |
| 218   | 1                        | 16 | 3 | 8 | -  | 5 | 6 | 19 | -  | 10 | -  | -  | - | -  | -  | -  | -  | - | -  |
| 219   | 1                        | 16 | 3 | 8 | -  | - | 6 | -  | -  | 10 | -  | 12 | - | -  | -  | 21 | -  | - | -  |
| 220   | 1                        | -  | 3 | 8 | 15 | - | 6 | -  | -  | -  | -  | -  | - | -  | 11 | -  | 14 | - | -  |
| 221   | 1                        | 16 | 3 | 8 | -  | 5 | 6 | 19 | -  | -  | -  | -  | - | -  | 11 | -  | -  | - | -  |
| 222   | 1                        | 16 | 3 | 8 | -  | 5 | 6 | 19 | -  | -  | -  | 12 | - | -  | -  | -  | -  | - | -  |
| 223   | 1                        | 16 | 3 | 8 | -  | 5 | 6 | 19 | 13 | -  | -  | -  | - | -  | -  | -  | -  | - | -  |
| 224   | 1                        | 16 | 3 | 8 | -  | 5 | 6 | 19 | -  | -  | -  | -  | - | -  | -  | -  | 14 | - | -  |
| 225   | 1                        | 16 | 3 | 8 | 15 | 5 | 6 | 19 | -  | -  | -  | -  | - | -  | -  | -  | -  | - | -  |
| 226   | 1                        | 16 | 3 | 8 | -  | 5 | 6 | 19 | -  | -  | 17 | -  | - | -  | -  | -  | -  | - | -  |
| 227   | 1                        | 16 | 3 | 8 | -  | 5 | 6 | 19 | -  | -  | -  | -  | - | 18 | -  | -  | -  | - | -  |
| 228   | 1                        | 16 | 3 | 8 | -  | 5 | 6 | 19 | -  | -  | -  | -  | - | -  | -  | -  | -  | 7 | -  |
| 229   | 1                        | 16 | 3 | 8 | -  | 5 | 6 | 19 | -  | -  | -  | 12 | - | -  | -  | 21 | -  | - | -  |
| 230   | 1                        | 16 | 3 | - | 15 | - | 6 | -  | -  | -  | -  | -  | 9 | -  | 11 | -  | -  | - | -  |
| 231   | 1                        | 16 | 3 | - | 15 | 5 | 6 | 19 | -  | -  | -  | -  | 9 | -  | -  | -  | -  | - | -  |
| 232   | 1                        | 16 | 3 | - | 15 | - | 6 | -  | -  | 10 | -  | -  | - | -  | 11 | -  | -  | - | -  |
| 233   | 1                        | 16 | 3 | - | -  | 5 | 6 | 19 | -  | 10 | -  | -  | - | -  | 11 | -  | -  | - | -  |
| 234   | 1                        | 16 | 3 | - | 15 | - | 6 | -  | -  | 10 | -  | -  | - | -  | -  | -  | 14 | - | -  |
| 235   | 1                        | 16 | 3 | - | 15 | 5 | 6 | 19 | -  | 10 | -  | -  | - | -  | -  | -  | -  | - | -  |
| 236   | 1                        | 16 | 3 | - | -  | 5 | 6 | 19 | 13 | -  | -  | -  | - | -  | -  | -  | 14 | - | -  |
| 237   | 1                        | 16 | 3 | - | -  | - | 6 | -  | 13 | -  | -  | 12 | - | -  | -  | 21 | 14 | - | -  |
| 238   | 1                        | 16 | 3 | - | -  | 5 | 6 | 19 | 13 | -  | -  | 12 | - | -  | -  | 21 | -  | - | -  |
| 239   | 1                        | 16 | 3 | - | 15 | 5 | 6 | 19 | -  | -  | -  | -  | - | -  | -  | -  | 14 | - | -  |
| 240   | 1                        | 16 | 3 | - | -  | 5 | 6 | 19 | -  | -  | 17 | -  | - | -  | -  | -  | 14 | - | -  |
| 241   | 1                        | 16 | 3 | - | -  | 5 | 6 | 19 | -  | -  | 17 | -  | - | 18 | -  | -  | -  | - | -  |
| 242   | 1                        | 16 | 3 | - | -  | 5 | 6 | 19 | -  | -  | -  | 12 | - | -  | -  | 21 | -  | 7 | -  |
| 243   | 1                        | 16 | 3 | 8 | -  | 5 | - | 19 | -  | -  | -  | -  | 9 | -  | -  | -  | -  | 7 | -  |
| 244   | 1                        | 16 | 3 | 8 | -  | 5 | - | 19 | -  | 10 | -  | -  | - | -  | -  | -  | -  | 7 | -  |
| 245   | 1                        | 16 | 3 | 8 | -  | - | 6 | -  | -  | 10 | -  | 12 | - | -  | -  | 21 | -  | 7 | -  |
| 246   | 1                        | 16 | 3 | 8 | -  | 5 | - | 19 | -  | -  | -  | -  | - | -  | 11 | -  | -  | 7 | -  |
| 247   | 1                        | 16 | 3 | 8 | -  | 5 | - | 19 | -  | -  | -  | 12 | - | -  | -  | -  | -  | 7 | -  |
| 248   | 1                        | 16 | 3 | 8 | -  | 5 | - | 19 | 13 | -  | -  | -  | - | -  | -  | -  | -  | 7 | -  |
| 249   | 1                        | 16 | 3 | 8 | -  | 5 | - | 19 | -  | -  | -  | -  | - | -  | -  | -  | 14 | 7 | -  |
| 250   | 1                        | 16 | 3 | 8 | 15 | 5 | - | 19 | -  | -  | -  | -  | - | -  | -  | -  | -  | 7 | -  |

Table S5: Continuation of table S4.

| Model | Recoded variable indices |    |   |   |    |   |   |    |    |    |    |    |   |    |    |    |    |    |   |    |   |   |
|-------|--------------------------|----|---|---|----|---|---|----|----|----|----|----|---|----|----|----|----|----|---|----|---|---|
| 251   | 1                        | 16 | 3 | 8 | -  | 5 | - | 19 | -  | -  | 17 | -  | - | -  | -  | -  | 7  | -  | - | -  |   |   |
| 252   | 1                        | 16 | 3 | 8 | -  | 5 | 6 | 19 | -  | -  | -  | -  | - | 18 | -  | -  | -  | 7  | - | -  | - |   |
| 253   | 1                        | 16 | 3 | 8 | -  | 5 | 6 | 19 | -  | -  | -  | -  | - | -  | -  | -  | -  | 7  | - | 20 | - |   |
| 254   | 1                        | 16 | 3 | 8 | -  | 5 | 6 | 19 | -  | -  | -  | 12 | - | -  | -  | 21 | -  | 7  | - | -  | - |   |
| 255   | 1                        | -  | 3 | - | 15 | - | - | -  | -  | -  | 17 | -  | 9 | -  | 11 | -  | -  | 7  | - | -  | - |   |
| 256   | 1                        | 16 | 3 | - | -  | 5 | - | 19 | -  | -  | -  | -  | 9 | -  | 11 | -  | -  | 7  | - | -  | - |   |
| 257   | 1                        | 16 | 3 | - | -  | 5 | - | 19 | -  | -  | -  | -  | 9 | -  | -  | -  | 14 | 7  | - | -  | - |   |
| 258   | 1                        | 16 | 3 | - | 15 | 5 | - | 19 | -  | -  | -  | -  | 9 | -  | -  | -  | -  | 7  | - | -  | - |   |
| 259   | 1                        | 16 | 3 | - | 15 | - | - | -  | -  | 10 | -  | -  | - | -  | -  | 11 | -  | -  | 7 | -  | - | - |
| 260   | 1                        | 16 | 3 | - | -  | 5 | - | 19 | -  | 10 | -  | -  | - | -  | -  | -  | -  | 14 | 7 | -  | - | - |
| 261   | 1                        | 16 | 3 | - | 15 | 5 | - | 19 | -  | 10 | -  | -  | - | -  | -  | -  | -  | 7  | - | -  | - | - |
| 262   | 1                        | 16 | 3 | - | -  | 5 | 6 | 19 | 13 | -  | -  | 12 | - | -  | -  | 21 | -  | 7  | - | -  | - | - |
| 263   | 1                        | 16 | 3 | - | 15 | 5 | - | 19 | -  | -  | -  | -  | - | -  | -  | -  | 14 | 7  | - | -  | - | - |
| 264   | 1                        | 16 | 3 | 8 | -  | 5 | - | 19 | -  | 10 | -  | -  | 9 | -  | -  | -  | -  | -  | - | -  | - | - |
| 265   | 1                        | 16 | 3 | 8 | -  | - | 6 | -  | -  | 10 | -  | 12 | 9 | -  | -  | 21 | -  | -  | - | -  | - | - |
| 266   | 1                        | 16 | 3 | 8 | 15 | - | - | -  | -  | -  | -  | -  | 9 | -  | 11 | -  | -  | -  | - | -  | - | - |
| 267   | 1                        | 16 | 3 | 8 | -  | 5 | - | 19 | -  | -  | -  | -  | 9 | -  | 11 | -  | -  | -  | - | -  | - | - |
| 268   | 1                        | 16 | 3 | 8 | -  | - | - | -  | 13 | -  | -  | 12 | 9 | -  | -  | -  | -  | -  | - | -  | - | - |
| 269   | 1                        | 16 | 3 | 8 | -  | 5 | - | 19 | -  | -  | -  | 12 | 9 | -  | -  | -  | -  | -  | - | -  | - | - |
| 270   | 1                        | 16 | 3 | 8 | -  | - | - | -  | 13 | -  | -  | -  | 9 | -  | -  | -  | 14 | -  | - | -  | - | - |
| 271   | 1                        | 16 | 3 | 8 | 15 | - | - | -  | 13 | -  | -  | -  | 9 | -  | -  | -  | -  | -  | - | -  | - | - |
| 272   | 1                        | 16 | 3 | 8 | -  | 5 | - | 19 | 13 | -  | -  | -  | 9 | -  | -  | -  | -  | -  | - | -  | - | - |
| 273   | 1                        | 16 | 3 | 8 | -  | - | 6 | -  | 13 | -  | -  | 12 | 9 | -  | -  | 21 | -  | -  | - | -  | - | - |
| 274   | 1                        | 16 | 3 | 8 | -  | 5 | - | 19 | -  | -  | -  | -  | 9 | -  | -  | -  | 14 | -  | - | -  | - | - |
| 275   | 1                        | 16 | 3 | 8 | 15 | 5 | - | 19 | -  | -  | -  | -  | 9 | -  | -  | -  | -  | -  | - | -  | - | - |
| 276   | 1                        | 16 | 3 | 8 | -  | 5 | - | 19 | -  | -  | 17 | -  | 9 | -  | -  | -  | -  | -  | - | -  | - | - |
| 277   | 1                        | 16 | 3 | 8 | -  | 5 | 6 | 19 | -  | -  | -  | -  | 9 | 18 | -  | -  | -  | -  | - | -  | - | - |
| 278   | 1                        | 16 | 3 | 8 | -  | 5 | 6 | 19 | -  | -  | -  | -  | 9 | -  | -  | -  | -  | 7  | - | 20 | - | - |
| 279   | 1                        | 16 | 3 | 8 | -  | 5 | 6 | 19 | -  | -  | -  | 12 | 9 | -  | -  | 21 | -  | -  | - | -  | - | - |
| 280   | 1                        | 16 | 3 | 8 | -  | - | - | -  | -  | 10 | -  | 12 | - | -  | 11 | -  | -  | -  | - | -  | - | - |
| 281   | 1                        | -  | 3 | 8 | 15 | - | - | -  | 13 | 10 | -  | -  | - | -  | 11 | -  | -  | -  | - | -  | - | - |
| 282   | 1                        | -  | 3 | 8 | 15 | - | - | -  | -  | 10 | -  | -  | - | -  | 11 | -  | 14 | -  | - | -  | - | - |
| 283   | 1                        | 16 | 3 | 8 | -  | - | - | -  | -  | 10 | -  | -  | - | -  | 11 | -  | 14 | -  | - | -  | - | - |
| 284   | 1                        | 16 | 3 | 8 | 15 | - | - | -  | -  | 10 | -  | -  | - | -  | 11 | -  | -  | -  | - | -  | - | - |
| 285   | 1                        | -  | 3 | 8 | 15 | - | - | -  | -  | 10 | 17 | -  | - | -  | 11 | -  | -  | -  | - | -  | - | - |
| 286   | 1                        | -  | 3 | 8 | 15 | - | 6 | -  | -  | 10 | -  | -  | - | 18 | 11 | -  | -  | -  | - | -  | - | - |
| 287   | 1                        | -  | 3 | 8 | 15 | 5 | - | 19 | -  | 10 | -  | -  | - | -  | 11 | -  | -  | -  | - | -  | - | - |
| 288   | 1                        | 16 | 3 | 8 | -  | 5 | - | 19 | -  | 10 | -  | -  | - | -  | 11 | -  | -  | -  | - | -  | - | - |
| 289   | 1                        | 16 | 3 | 8 | -  | - | 6 | -  | -  | 10 | -  | 12 | - | -  | 11 | 21 | -  | -  | - | -  | - | - |
| 290   | 1                        | 16 | 3 | 8 | -  | - | - | -  | -  | 10 | -  | 12 | - | -  | -  | -  | 14 | -  | - | -  | - | - |
| 291   | 1                        | 16 | 3 | 8 | 15 | - | - | -  | -  | 10 | -  | 12 | - | -  | -  | -  | -  | -  | - | -  | - | - |
| 292   | 1                        | 16 | 3 | 8 | -  | 5 | - | 19 | -  | 10 | -  | 12 | - | -  | -  | -  | -  | -  | - | -  | - | - |
| 293   | 1                        | 16 | 3 | 8 | -  | - | 6 | -  | -  | 10 | -  | 12 | - | -  | -  | 21 | -  | -  | - | -  | - | - |
| 294   | 1                        | 16 | 3 | 8 | -  | 5 | - | 19 | 13 | 10 | -  | -  | - | -  | -  | -  | -  | -  | - | -  | - | - |
| 295   | 1                        | 16 | 3 | 8 | -  | - | 6 | -  | 13 | 10 | -  | 12 | - | -  | -  | 21 | -  | -  | - | -  | - | - |
| 296   | 1                        | 16 | 3 | 8 | 15 | - | - | -  | -  | 10 | -  | -  | - | -  | -  | -  | 14 | -  | - | -  | - | - |
| 297   | 1                        | 16 | 3 | 8 | -  | 5 | - | 19 | -  | 10 | -  | -  | - | -  | -  | -  | 14 | -  | - | -  | - | - |
| 298   | 1                        | 16 | 3 | 8 | -  | - | 6 | -  | -  | 10 | -  | 12 | - | -  | -  | 21 | 14 | -  | - | -  | - | - |
| 299   | 1                        | 16 | 3 | 8 | 15 | - | - | -  | -  | 10 | 17 | -  | - | -  | -  | -  | -  | -  | - | -  | - | - |
| 300   | 1                        | 16 | 3 | 8 | 15 | 5 | - | 19 | -  | 10 | -  | -  | - | -  | -  | -  | -  | -  | - | -  | - | - |

Table S6: Continuation of table S5.

| Model | Recoded variable indices |    |   |   |    |   |   |    |    |    |    |    |   |    |    |    |    |   |   |    |
|-------|--------------------------|----|---|---|----|---|---|----|----|----|----|----|---|----|----|----|----|---|---|----|
| 301   | 1                        | 16 | 3 | 8 | 15 | - | 6 | -  | -  | 10 | -  | 12 | - | -  | -  | 21 | -  | - | - | -  |
| 302   | 1                        | 16 | 3 | 8 | -  | 5 | - | 19 | -  | 10 | 17 | -  | - | -  | -  | -  | -  | - | - | -  |
| 303   | 1                        | 16 | 3 | 8 | -  | - | 6 | -  | -  | 10 | 17 | 12 | - | -  | -  | 21 | -  | - | - | -  |
| 304   | 1                        | 16 | 3 | 8 | -  | 5 | 6 | 19 | -  | 10 | -  | -  | - | 18 | -  | -  | -  | - | - | -  |
| 305   | 1                        | 16 | 3 | 8 | -  | - | 6 | -  | -  | 10 | -  | 12 | - | 18 | -  | 21 | -  | - | - | -  |
| 306   | 1                        | 16 | 3 | 8 | -  | 5 | 6 | 19 | -  | 10 | -  | -  | - | -  | -  | -  | -  | 7 | - | 20 |
| 307   | 1                        | 16 | 3 | 8 | -  | 5 | 6 | 19 | -  | 10 | -  | 12 | - | -  | -  | 21 | -  | - | - | -  |
| 308   | 1                        | 16 | 3 | 8 | -  | - | 6 | -  | -  | 10 | -  | 12 | - | -  | -  | 21 | -  | 7 | - | 20 |
| 309   | 1                        | 16 | 3 | 8 | -  | 5 | - | 19 | -  | -  | -  | 12 | - | -  | 11 | -  | -  | - | - | -  |
| 310   | 1                        | 16 | 3 | 8 | -  | 5 | - | 19 | 13 | -  | -  | -  | - | -  | 11 | -  | -  | - | - | -  |
| 311   | 1                        | 16 | 3 | 8 | 15 | - | - | -  | -  | -  | -  | -  | - | -  | 11 | -  | 14 | - | - | -  |
| 312   | 1                        | -  | 3 | 8 | 15 | - | - | -  | -  | -  | 17 | -  | - | -  | 11 | -  | 14 | - | - | -  |
| 313   | 1                        | -  | 3 | 8 | 15 | - | 6 | -  | -  | -  | -  | -  | - | 18 | 11 | -  | 14 | - | - | -  |
| 314   | 1                        | 16 | 3 | 8 | -  | 5 | - | 19 | -  | -  | -  | -  | - | -  | 11 | -  | 14 | - | - | -  |
| 315   | 1                        | 16 | 3 | 8 | 15 | - | - | -  | -  | -  | 17 | -  | - | -  | 11 | -  | -  | - | - | -  |
| 316   | 1                        | 16 | 3 | 8 | 15 | 5 | - | 19 | -  | -  | -  | -  | - | -  | 11 | -  | -  | - | - | -  |
| 317   | 1                        | 16 | 3 | 8 | 15 | - | 6 | -  | -  | -  | -  | 12 | - | -  | 11 | 21 | -  | - | - | -  |
| 318   | 1                        | 16 | 3 | 8 | -  | 5 | - | 19 | -  | -  | 17 | -  | - | -  | 11 | -  | -  | - | - | -  |
| 319   | 1                        | 16 | 3 | 8 | -  | 5 | 6 | 19 | -  | -  | -  | -  | - | 18 | 11 | -  | -  | - | - | -  |
| 320   | 1                        | 16 | 3 | 8 | -  | 5 | 6 | 19 | -  | -  | -  | -  | - | -  | 11 | -  | -  | 7 | - | 20 |
| 321   | 1                        | 16 | 3 | 8 | -  | 5 | 6 | 19 | -  | -  | -  | 12 | - | -  | 11 | 21 | -  | - | - | -  |
| 322   | 1                        | 16 | 3 | 8 | -  | 5 | - | 19 | 13 | -  | -  | 12 | - | -  | -  | -  | -  | - | - | -  |
| 323   | 1                        | 16 | 3 | 8 | -  | 5 | - | 19 | -  | -  | -  | 12 | - | -  | -  | -  | 14 | - | - | -  |
| 324   | 1                        | 16 | 3 | 8 | 15 | 5 | - | 19 | -  | -  | -  | 12 | - | -  | -  | -  | -  | - | - | -  |
| 325   | 1                        | 16 | 3 | 8 | -  | 5 | - | 19 | -  | -  | 17 | 12 | - | -  | -  | -  | -  | - | - | -  |
| 326   | 1                        | 16 | 3 | 8 | -  | 5 | 6 | 19 | -  | -  | -  | 12 | - | 18 | -  | -  | -  | - | - | -  |
| 327   | 1                        | 16 | 3 | 8 | -  | 5 | 6 | 19 | -  | -  | -  | 12 | - | -  | -  | -  | -  | 7 | - | 20 |
| 328   | 1                        | 16 | 3 | 8 | -  | 5 | 6 | 19 | -  | -  | -  | 12 | - | -  | -  | 21 | -  | - | - | -  |
| 329   | 1                        | 16 | 3 | 8 | 15 | - | - | -  | 13 | -  | -  | -  | - | -  | -  | -  | 14 | - | - | -  |
| 330   | 1                        | 16 | 3 | 8 | -  | 5 | - | 19 | 13 | -  | -  | -  | - | -  | -  | -  | 14 | - | - | -  |
| 331   | 1                        | 16 | 3 | 8 | -  | - | 6 | -  | 13 | -  | -  | 12 | - | -  | -  | 21 | 14 | - | - | -  |
| 332   | 1                        | 16 | 3 | 8 | 15 | 5 | - | 19 | 13 | -  | -  | -  | - | -  | -  | -  | -  | - | - | -  |
| 333   | 1                        | 16 | 3 | 8 | 15 | - | 6 | -  | 13 | -  | -  | 12 | - | -  | -  | 21 | -  | - | - | -  |
| 334   | 1                        | 16 | 3 | 8 | -  | 5 | - | 19 | 13 | -  | 17 | -  | - | -  | -  | -  | -  | - | - | -  |
| 335   | 1                        | 16 | 3 | 8 | -  | 5 | 6 | 19 | 13 | -  | -  | -  | - | 18 | -  | -  | -  | - | - | -  |
| 336   | 1                        | 16 | 3 | 8 | -  | 5 | 6 | 19 | 13 | -  | -  | -  | - | -  | -  | -  | -  | 7 | - | 20 |
| 337   | 1                        | 16 | 3 | 8 | -  | 5 | 6 | 19 | 13 | -  | -  | 12 | - | -  | -  | 21 | -  | - | - | -  |
| 338   | 1                        | 16 | 3 | 8 | 15 | 5 | - | 19 | -  | -  | -  | -  | - | -  | -  | -  | 14 | - | - | -  |
| 339   | 1                        | 16 | 3 | 8 | -  | 5 | - | 19 | -  | -  | 17 | -  | - | -  | -  | -  | 14 | - | - | -  |
| 340   | 1                        | 16 | 3 | 8 | -  | 5 | 6 | 19 | -  | -  | -  | -  | - | 18 | -  | -  | 14 | - | - | -  |
| 341   | 1                        | 16 | 3 | 8 | -  | 5 | 6 | 19 | -  | -  | -  | -  | - | -  | -  | -  | 14 | 7 | - | 20 |
| 342   | 1                        | 16 | 3 | 8 | -  | 5 | 6 | 19 | -  | -  | -  | 12 | - | -  | -  | 21 | 14 | - | - | -  |
| 343   | 1                        | 16 | 3 | 8 | 15 | 5 | - | 19 | -  | -  | 17 | -  | - | -  | -  | -  | -  | - | - | -  |
| 344   | 1                        | 16 | 3 | 8 | 15 | 5 | 6 | 19 | -  | -  | -  | -  | - | 18 | -  | -  | -  | - | - | -  |
| 345   | 1                        | 16 | 3 | 8 | 15 | 5 | 6 | 19 | -  | -  | -  | -  | - | -  | -  | -  | -  | 7 | - | 20 |
| 346   | 1                        | 16 | 3 | 8 | 15 | 5 | 6 | 19 | -  | -  | -  | 12 | - | -  | -  | 21 | -  | - | - | -  |
| 347   | 1                        | 16 | 3 | 8 | -  | 5 | 6 | 19 | -  | -  | 17 | -  | - | 18 | -  | -  | -  | - | - | -  |
| 348   | 1                        | 16 | 3 | 8 | -  | 5 | 6 | 19 | -  | -  | 17 | -  | - | -  | -  | -  | -  | 7 | - | 20 |
| 349   | 1                        | 16 | 3 | 8 | -  | 5 | 6 | 19 | -  | -  | 17 | 12 | - | -  | -  | 21 | -  | - | - | -  |
| 350   | 1                        | 16 | 3 | 8 | -  | 5 | 6 | 19 | -  | -  | -  | -  | - | 18 | -  | -  | -  | 7 | - | 20 |

Table S7: Continuation of table S6.



| Model | Recoded variable indices |    |   |   |    |   |   |    |    |    |    |    |   |    |    |    |    |   |   |    |
|-------|--------------------------|----|---|---|----|---|---|----|----|----|----|----|---|----|----|----|----|---|---|----|
| 351   | 1                        | 16 | 3 | 8 | -  | 5 | 6 | 19 | -  | -  | -  | 12 | - | 18 | -  | 21 | -  | - | - | -  |
| 352   | 1                        | 16 | 3 | 8 | -  | 5 | 6 | 19 | -  | -  | -  | 12 | - | -  | -  | 21 | -  | 7 | - | 20 |
| 353   | 1                        | 16 | 3 | - | 15 | - | - | -  | -  | 10 | -  | -  | 9 | -  | 11 | -  | -  | - | - | -  |
| 354   | 1                        | 16 | 3 | - | -  | 5 | - | 19 | 13 | 10 | -  | -  | 9 | -  | -  | -  | -  | - | - | -  |
| 355   | 1                        | 16 | 3 | - | 15 | 5 | - | 19 | -  | 10 | -  | -  | 9 | -  | -  | -  | -  | - | - | -  |
| 356   | 1                        | 16 | 3 | - | 15 | - | - | -  | -  | -  | -  | 12 | 9 | -  | 11 | -  | -  | - | - | -  |
| 357   | 1                        | 16 | 3 | - | 15 | - | - | -  | 13 | -  | -  | -  | 9 | -  | 11 | -  | -  | - | - | -  |
| 358   | 1                        | 16 | 3 | - | 15 | - | - | -  | -  | -  | -  | -  | 9 | -  | 11 | -  | 14 | - | - | -  |
| 359   | 1                        | 16 | 3 | - | 15 | - | - | -  | -  | -  | 17 | -  | 9 | -  | 11 | -  | -  | - | - | -  |
| 360   | 1                        | 16 | 3 | - | 15 | 5 | - | 19 | -  | -  | -  | -  | 9 | -  | 11 | -  | -  | - | - | -  |
| 361   | 1                        | 16 | 3 | - | 15 | - | 6 | -  | -  | -  | -  | 12 | 9 | -  | 11 | 21 | -  | - | - | -  |
| 362   | 1                        | 16 | 3 | - | 15 | 5 | - | 19 | -  | -  | -  | 12 | 9 | -  | -  | -  | -  | - | - | -  |
| 363   | 1                        | 16 | 3 | - | 15 | - | - | -  | 13 | -  | -  | -  | 9 | -  | -  | -  | 14 | - | - | -  |
| 364   | 1                        | 16 | 3 | - | 15 | 5 | - | 19 | 13 | -  | -  | -  | 9 | -  | -  | -  | -  | - | - | -  |
| 365   | 1                        | 16 | 3 | - | 15 | 5 | - | 19 | -  | -  | -  | -  | 9 | -  | -  | -  | 14 | - | - | -  |
| 366   | 1                        | 16 | 3 | - | 15 | 5 | - | 19 | -  | -  | 17 | -  | 9 | -  | -  | -  | -  | - | - | -  |
| 367   | 1                        | 16 | 3 | - | 15 | 5 | 6 | 19 | -  | -  | -  | -  | 9 | 18 | -  | -  | -  | - | - | -  |
| 368   | 1                        | 16 | 3 | - | 15 | 5 | 6 | 19 | -  | -  | -  | -  | 9 | -  | -  | -  | -  | 7 | - | 20 |
| 369   | 1                        | 16 | 3 | - | 15 | 5 | 6 | 19 | -  | -  | -  | 12 | 9 | -  | -  | 21 | -  | - | - | -  |
| 370   | 1                        | 16 | 3 | - | -  | 5 | 6 | 19 | -  | -  | 17 | -  | 9 | -  | -  | -  | -  | 7 | - | 20 |
| 371   | 1                        | 16 | 3 | - | -  | 5 | 6 | 19 | -  | -  | -  | 12 | 9 | -  | -  | 21 | -  | 7 | - | 20 |
| 372   | 1                        | 16 | 3 | - | 15 | - | - | -  | -  | 10 | -  | 12 | - | -  | 11 | -  | -  | - | - | -  |
| 373   | 1                        | -  | 3 | - | 15 | - | - | -  | -  | 10 | 17 | 12 | - | -  | 11 | -  | -  | - | - | -  |
| 374   | 1                        | 16 | 3 | - | -  | 5 | - | 19 | -  | 10 | -  | 12 | - | -  | 11 | -  | -  | - | - | -  |
| 375   | 1                        | 16 | 3 | - | 15 | - | - | -  | 13 | 10 | -  | -  | - | -  | 11 | -  | -  | - | - | -  |
| 376   | 1                        | 16 | 3 | - | -  | 5 | - | 19 | 13 | 10 | -  | -  | - | -  | 11 | -  | -  | - | - | -  |
| 377   | 1                        | 16 | 3 | - | 15 | - | - | -  | -  | 10 | -  | -  | - | -  | 11 | -  | 14 | - | - | -  |
| 378   | 1                        | 16 | 3 | - | -  | 5 | - | 19 | -  | 10 | -  | -  | - | -  | 11 | -  | 14 | - | - | -  |
| 379   | 1                        | 16 | 3 | - | 15 | - | - | -  | -  | 10 | 17 | -  | - | -  | 11 | -  | -  | - | - | -  |
| 380   | 1                        | 16 | 3 | - | 15 | - | 6 | -  | -  | 10 | -  | -  | - | 18 | 11 | -  | -  | - | - | -  |
| 381   | 1                        | 16 | 3 | - | 15 | 5 | - | 19 | -  | 10 | -  | -  | - | -  | 11 | -  | -  | - | - | -  |
| 382   | 1                        | 16 | 3 | - | 15 | - | 6 | -  | -  | 10 | -  | -  | - | -  | 11 | -  | -  | 7 | - | 20 |
| 383   | 1                        | 16 | 3 | - | 15 | - | 6 | -  | -  | 10 | -  | 12 | - | -  | 11 | 21 | -  | - | - | -  |
| 384   | 1                        | 16 | 3 | - | -  | 5 | 6 | 19 | -  | 10 | -  | -  | - | -  | 11 | -  | -  | 7 | - | 20 |
| 385   | 1                        | 16 | 3 | - | 15 | 5 | - | 19 | -  | 10 | -  | 12 | - | -  | -  | -  | -  | - | - | -  |
| 386   | 1                        | 16 | 3 | - | 15 | - | - | -  | 13 | 10 | -  | -  | - | -  | -  | -  | 14 | - | - | -  |
| 387   | 1                        | 16 | 3 | - | 15 | 5 | - | 19 | 13 | 10 | -  | -  | - | -  | -  | -  | -  | - | - | -  |
| 388   | 1                        | 16 | 3 | - | 15 | - | 6 | -  | 13 | 10 | -  | 12 | - | -  | -  | 21 | -  | - | - | -  |
| 389   | 1                        | 16 | 3 | - | 15 | - | - | -  | -  | 10 | 17 | -  | - | -  | -  | -  | 14 | - | - | -  |
| 390   | 1                        | 16 | 3 | - | 15 | 5 | - | 19 | -  | 10 | -  | -  | - | -  | -  | -  | 14 | - | - | -  |
| 391   | 1                        | 16 | 3 | - | 15 | 5 | - | 19 | -  | 10 | 17 | -  | - | -  | -  | -  | -  | - | - | -  |
| 392   | 1                        | 16 | 3 | - | 15 | 5 | 6 | 19 | -  | 10 | -  | -  | - | 18 | -  | -  | -  | - | - | -  |
| 393   | 1                        | 16 | 3 | - | 15 | 5 | 6 | 19 | -  | 10 | -  | -  | - | -  | -  | -  | -  | 7 | - | 20 |
| 394   | 1                        | 16 | 3 | - | 15 | 5 | 6 | 19 | -  | 10 | -  | 12 | - | -  | -  | 21 | -  | - | - | -  |
| 395   | 1                        | 16 | 3 | - | -  | 5 | 6 | 19 | -  | 10 | 17 | -  | - | -  | -  | -  | -  | 7 | - | 20 |
| 396   | 1                        | 16 | 3 | - | -  | 5 | 6 | 19 | -  | 10 | -  | 12 | - | -  | -  | 21 | -  | 7 | - | 20 |
| 397   | 1                        | 16 | 3 | - | 15 | - | - | -  | 13 | -  | 17 | -  | - | -  | 11 | -  | -  | - | - | -  |
| 398   | 1                        | 16 | 3 | - | 15 | - | - | -  | -  | -  | 17 | -  | - | -  | 11 | -  | 14 | - | - | -  |
| 399   | 1                        | 16 | 3 | - | 15 | 5 | - | 19 | -  | -  | -  | -  | - | -  | 11 | -  | 14 | - | - | -  |
| 400   | 1                        | 16 | 3 | - | 15 | - | 6 | -  | -  | -  | -  | -  | - | -  | 11 | -  | 14 | 7 | - | 20 |

Table S8: Continuation of table S7.

| Model | Recoded variable indices |    |   |   |    |   |   |    |    |    |    |    |   |    |    |    |    |   |    |
|-------|--------------------------|----|---|---|----|---|---|----|----|----|----|----|---|----|----|----|----|---|----|
| 401   | 1                        | 16 | 3 | - | 15 | - | 6 | -  | -  | -  | 12 | -  | - | 11 | 21 | 14 | -  | - | -  |
| 402   | 1                        | 16 | 3 | - | 15 | - | - | -  | 13 | -  | 17 | 12 | - | -  | -  | -  | -  | - | -  |
| 403   | 1                        | 16 | 3 | - | 15 | 5 | - | 19 | -  | -  | 12 | -  | - | -  | -  | 14 | -  | - | -  |
| 404   | 1                        | 16 | 3 | - | -  | 5 | 6 | 19 | -  | -  | 12 | -  | - | -  | 21 | -  | 7  | - | 20 |
| 405   | 1                        | 16 | 3 | - | 15 | - | - | -  | 13 | -  | 17 | -  | - | -  | -  | 14 | -  | - | -  |
| 406   | 1                        | 16 | 3 | - | 15 | 5 | - | 19 | 13 | -  | -  | -  | - | -  | -  | 14 | -  | - | -  |
| 407   | 1                        | 16 | 3 | - | 15 | - | 6 | -  | 13 | -  | -  | 12 | - | -  | -  | 21 | 14 | - | -  |
| 408   | 1                        | 16 | 3 | - | 15 | 5 | - | 19 | 13 | -  | 17 | -  | - | -  | -  | -  | -  | - | -  |
| 409   | 1                        | 16 | 3 | - | 15 | - | 6 | -  | 13 | -  | 17 | 12 | - | -  | -  | 21 | -  | - | -  |
| 410   | 1                        | 16 | 3 | - | 15 | - | 6 | -  | 13 | -  | -  | 12 | - | 18 | -  | 21 | -  | - | -  |
| 411   | 1                        | 16 | 3 | - | 15 | 5 | 6 | 19 | 13 | -  | -  | 12 | - | -  | -  | 21 | -  | - | -  |
| 412   | 1                        | 16 | 3 | - | 15 | - | 6 | -  | 13 | -  | -  | 12 | - | -  | -  | 21 | -  | 7 | 20 |
| 413   | 1                        | 16 | 3 | - | -  | 5 | 6 | 19 | 13 | -  | -  | 12 | - | -  | -  | 21 | -  | 7 | 20 |
| 414   | 1                        | 16 | 3 | - | 15 | 5 | - | 19 | -  | -  | 17 | -  | - | -  | -  | 14 | -  | - | -  |
| 415   | 1                        | 16 | 3 | - | 15 | 5 | 6 | 19 | -  | -  | -  | -  | - | 18 | -  | -  | 14 | - | -  |
| 416   | 1                        | 16 | 3 | - | 15 | 5 | 6 | 19 | -  | -  | -  | -  | - | -  | -  | 14 | 7  | - | 20 |
| 417   | 1                        | 16 | 3 | - | 15 | 5 | 6 | 19 | -  | -  | -  | 12 | - | -  | -  | 21 | 14 | - | -  |
| 418   | 1                        | 16 | 3 | - | 15 | 5 | 6 | 19 | -  | -  | 17 | -  | - | 18 | -  | -  | -  | - | -  |
| 419   | 1                        | 16 | 3 | - | 15 | 5 | 6 | 19 | -  | -  | -  | 12 | - | 18 | -  | 21 | -  | - | -  |
| 420   | 1                        | 16 | 3 | - | 15 | 5 | 6 | 19 | -  | -  | -  | 12 | - | -  | -  | 21 | -  | 7 | 20 |
| 421   | 1                        | 16 | - | 8 | 15 | 5 | - | -  | -  | -  | -  | -  | 9 | -  | -  | -  | -  | 4 | -  |
| 422   | 1                        | 16 | - | 8 | 15 | 5 | - | -  | -  | -  | 17 | -  | - | -  | -  | -  | -  | 4 | -  |
| 423   | 1                        | 16 | - | - | 15 | - | 6 | -  | -  | 10 | 17 | -  | - | -  | -  | -  | -  | 4 | -  |
| 424   | 1                        | -  | - | - | 15 | - | 6 | -  | -  | 10 | 17 | 12 | - | -  | -  | 21 | -  | - | 4  |
| 425   | 1                        | -  | - | - | 15 | - | - | -  | 13 | 10 | 17 | -  | - | -  | -  | -  | 7  | 4 | -  |
| 426   | 1                        | 16 | - | 8 | 15 | - | - | -  | -  | -  | -  | -  | 9 | -  | 11 | -  | -  | - | 4  |
| 427   | 1                        | -  | - | 8 | 15 | - | - | -  | -  | -  | 17 | -  | 9 | -  | 11 | -  | -  | - | 4  |
| 428   | 1                        | 16 | - | 8 | 15 | - | - | -  | 13 | -  | -  | -  | 9 | -  | -  | -  | -  | - | 4  |
| 429   | 1                        | 16 | 3 | 8 | -  | 5 | - | 19 | 13 | -  | -  | -  | 9 | -  | -  | -  | -  | - | 4  |
| 430   | 1                        | 16 | - | 8 | 15 | - | - | -  | -  | -  | 17 | -  | 9 | -  | -  | -  | -  | - | 4  |
| 431   | 1                        | 16 | 3 | 8 | 15 | 5 | - | 19 | -  | -  | -  | -  | 9 | -  | -  | -  | -  | - | 4  |
| 432   | 1                        | 16 | - | 8 | 15 | - | - | -  | -  | 10 | -  | -  | - | -  | 11 | -  | -  | - | 4  |
| 433   | 1                        | -  | - | 8 | 15 | - | - | -  | -  | 10 | 17 | -  | - | -  | 11 | -  | -  | - | 4  |
| 434   | 1                        | 16 | - | 8 | 15 | - | - | -  | 13 | 10 | -  | -  | - | -  | -  | -  | -  | - | 4  |
| 435   | 1                        | -  | - | 8 | 15 | - | - | -  | 13 | 10 | 17 | -  | - | -  | -  | -  | -  | - | 4  |
| 436   | 1                        | 16 | - | 8 | -  | - | 6 | -  | 13 | 10 | -  | 12 | - | -  | -  | 21 | -  | - | 4  |
| 437   | 1                        | 16 | - | 8 | 15 | - | - | -  | -  | 10 | 17 | -  | - | -  | -  | -  | -  | - | 4  |
| 438   | 1                        | -  | - | 8 | 15 | - | 6 | -  | -  | 10 | 17 | -  | - | 18 | -  | -  | -  | - | 4  |
| 439   | 1                        | -  | - | 8 | 15 | - | 6 | -  | -  | 10 | 17 | -  | - | -  | -  | -  | -  | 7 | 4  |
| 440   | 1                        | 16 | - | 8 | 15 | - | - | -  | -  | -  | -  | -  | - | -  | 11 | -  | 14 | - | 4  |
| 441   | 1                        | -  | - | 8 | 15 | - | - | -  | -  | -  | 17 | -  | - | -  | 11 | -  | 14 | - | 4  |
| 442   | 1                        | 16 | - | 8 | 15 | - | - | -  | -  | -  | 17 | -  | - | -  | 11 | -  | -  | - | 4  |
| 443   | 1                        | 16 | - | 8 | 15 | - | 6 | -  | 13 | -  | -  | 12 | - | -  | -  | 21 | -  | - | 4  |
| 444   | 1                        | 16 | - | - | 15 | - | - | -  | 13 | 10 | 17 | -  | - | -  | -  | -  | -  | - | 4  |
| 445   | 1                        | 16 | - | - | 15 | - | 6 | -  | -  | 10 | 17 | -  | - | -  | -  | -  | -  | 7 | 4  |
| 446   | 1                        | 16 | - | 8 | 15 | 5 | 6 | -  | -  | -  | -  | -  | 9 | -  | -  | -  | -  | - | -  |
| 447   | 1                        | 16 | - | 8 | 15 | 5 | - | -  | -  | -  | -  | -  | 9 | -  | -  | -  | -  | 7 | -  |
| 448   | 1                        | 16 | - | 8 | 15 | 5 | - | -  | -  | 10 | -  | -  | 9 | -  | -  | -  | -  | - | -  |
| 449   | 1                        | 16 | - | 8 | 15 | 5 | - | -  | -  | -  | -  | -  | 9 | -  | 11 | -  | -  | - | -  |
| 450   | 1                        | 16 | - | 8 | 15 | 5 | - | -  | -  | -  | -  | 12 | 9 | -  | -  | -  | -  | - | -  |

Table S9: Continuation of table S8.

| Model | Recoded variable indices |    |   |   |    |   |   |    |    |    |    |    |   |    |    |    |    |   |    |   |
|-------|--------------------------|----|---|---|----|---|---|----|----|----|----|----|---|----|----|----|----|---|----|---|
| 451   | 1                        | 16 | - | 8 | 15 | 5 | - | -  | 13 | -  | -  | -  | 9 | -  | -  | -  | -  | - | -  | - |
| 452   | 1                        | 16 | 3 | 8 | -  | 5 | - | 19 | 13 | -  | -  | -  | 9 | -  | -  | -  | -  | - | -  | - |
| 453   | 1                        | 16 | - | 8 | 15 | 5 | - | -  | -  | -  | -  | -  | 9 | -  | -  | -  | 14 | - | -  | - |
| 454   | 1                        | 16 | - | 8 | 15 | 5 | - | -  | -  | -  | 17 | -  | 9 | -  | -  | -  | -  | - | -  | - |
| 455   | 1                        | 16 | - | 8 | 15 | 5 | 6 | -  | -  | -  | -  | -  | 9 | 18 | -  | -  | -  | - | -  | - |
| 456   | 1                        | 16 | 3 | 8 | 15 | 5 | - | 19 | -  | -  | -  | -  | 9 | -  | -  | -  | -  | - | -  | - |
| 457   | 1                        | 16 | - | 8 | 15 | 5 | 6 | -  | -  | -  | -  | -  | 9 | -  | -  | -  | -  | 7 | 20 | - |
| 458   | 1                        | 16 | - | 8 | 15 | 5 | 6 | -  | -  | -  | -  | 12 | 9 | -  | -  | 21 | -  | - | -  | - |
| 459   | 1                        | 16 | - | 8 | 15 | 5 | - | -  | -  | 10 | -  | -  | - | -  | 11 | -  | -  | - | -  | - |
| 460   | 1                        | 16 | - | 8 | 15 | 5 | - | -  | 13 | 10 | -  | -  | - | -  | -  | -  | -  | - | -  | - |
| 461   | 1                        | 16 | - | 8 | -  | 5 | - | -  | 13 | 10 | 17 | -  | - | -  | -  | -  | -  | - | -  | - |
| 462   | 1                        | 16 | - | 8 | 15 | 5 | - | -  | -  | 10 | 17 | -  | - | -  | -  | -  | -  | - | -  | - |
| 463   | 1                        | 16 | - | 8 | 15 | 5 | 6 | -  | -  | 10 | -  | 12 | - | -  | -  | 21 | -  | - | -  | - |
| 464   | 1                        | 16 | - | 8 | 15 | 5 | - | -  | -  | -  | -  | -  | - | -  | 11 | -  | 14 | - | -  | - |
| 465   | 1                        | 16 | - | 8 | 15 | 5 | - | -  | -  | -  | 17 | 12 | - | -  | -  | -  | -  | - | -  | - |
| 466   | 1                        | 16 | - | 8 | 15 | 5 | - | -  | 13 | -  | 17 | -  | - | -  | -  | -  | -  | - | -  | - |
| 467   | 1                        | 16 | - | 8 | 15 | 5 | 6 | -  | 13 | -  | -  | 12 | - | -  | -  | 21 | -  | - | -  | - |
| 468   | 1                        | 16 | - | 8 | 15 | 5 | - | -  | -  | -  | 17 | -  | - | -  | -  | -  | 14 | - | -  | - |
| 469   | 1                        | 16 | - | 8 | 15 | 5 | 6 | -  | -  | -  | 17 | -  | - | 18 | -  | -  | -  | - | -  | - |
| 470   | 1                        | 16 | - | - | 15 | 5 | - | -  | -  | -  | 17 | 12 | 9 | -  | -  | -  | -  | - | -  | - |
| 471   | 1                        | 16 | - | - | 15 | 5 | - | -  | 13 | -  | 17 | -  | 9 | -  | -  | -  | -  | - | -  | - |
| 472   | 1                        | 16 | - | - | 15 | 5 | - | -  | -  | -  | 17 | -  | 9 | -  | -  | -  | 14 | - | -  | - |
| 473   | 1                        | 16 | - | - | 15 | 5 | 6 | -  | -  | -  | 17 | -  | 9 | 18 | -  | -  | -  | - | -  | - |
| 474   | 1                        | 16 | - | - | 15 | 5 | 6 | -  | -  | -  | 17 | -  | 9 | -  | -  | -  | -  | 7 | 20 | - |
| 475   | 1                        | 16 | - | - | 15 | 5 | 6 | -  | -  | -  | 17 | 12 | 9 | -  | -  | 21 | -  | - | -  | - |
| 476   | 1                        | 16 | - | - | 15 | 5 | - | -  | 13 | -  | 17 | -  | - | -  | -  | -  | 14 | - | -  | - |
| 477   | 1                        | 16 | - | 8 | 15 | - | 6 | -  | -  | -  | -  | -  | 9 | -  | 11 | -  | -  | - | -  | - |
| 478   | 1                        | 16 | - | 8 | 15 | - | 6 | -  | 13 | -  | -  | -  | 9 | -  | -  | -  | -  | - | -  | - |
| 479   | 1                        | 16 | 3 | 8 | -  | 5 | 6 | 19 | 13 | -  | -  | -  | 9 | -  | -  | -  | -  | - | -  | - |
| 480   | 1                        | 16 | 3 | 8 | 15 | 5 | 6 | 19 | -  | -  | -  | -  | 9 | -  | -  | -  | -  | - | -  | - |
| 481   | 1                        | 16 | - | 8 | 15 | - | 6 | -  | -  | 10 | -  | -  | - | -  | 11 | -  | -  | - | -  | - |
| 482   | 1                        | 16 | - | 8 | 15 | - | 6 | -  | -  | -  | -  | -  | - | -  | 11 | -  | 14 | - | -  | - |
| 483   | 1                        | 16 | - | - | 15 | - | 6 | -  | -  | -  | 17 | -  | 9 | -  | 11 | -  | -  | - | -  | - |
| 484   | 1                        | 16 | - | - | 15 | - | 6 | -  | -  | -  | 17 | -  | - | -  | 11 | -  | 14 | - | -  | - |
| 485   | 1                        | 16 | - | 8 | 15 | - | - | -  | -  | -  | -  | -  | 9 | -  | 11 | -  | -  | 7 | -  | - |
| 486   | 1                        | 16 | - | 8 | 15 | - | - | -  | 13 | -  | -  | -  | 9 | -  | -  | -  | -  | 7 | -  | - |
| 487   | 1                        | 16 | 3 | 8 | -  | 5 | - | 19 | 13 | -  | -  | -  | 9 | -  | -  | -  | -  | 7 | -  | - |
| 488   | 1                        | 16 | - | 8 | 15 | - | - | -  | -  | 10 | -  | -  | - | -  | 11 | -  | -  | 7 | -  | - |
| 489   | 1                        | 16 | - | 8 | 15 | - | - | -  | 13 | 10 | -  | -  | - | -  | -  | -  | -  | 7 | -  | - |
| 490   | 1                        | 16 | - | 8 | 15 | - | - | -  | -  | -  | -  | -  | - | -  | 11 | -  | 14 | 7 | -  | - |
| 491   | 1                        | 16 | - | 8 | 15 | - | 6 | -  | 13 | -  | -  | 12 | - | -  | -  | 21 | -  | 7 | -  | - |
| 492   | 1                        | 16 | - | 8 | 15 | - | - | -  | -  | 10 | -  | -  | 9 | -  | 11 | -  | -  | - | -  | - |
| 493   | 1                        | -  | - | 8 | 15 | - | - | -  | -  | 10 | 17 | -  | 9 | -  | 11 | -  | -  | - | -  | - |
| 494   | 1                        | 16 | - | 8 | 15 | - | - | -  | 13 | 10 | -  | -  | 9 | -  | -  | -  | -  | - | -  | - |
| 495   | 1                        | 16 | 3 | 8 | -  | 5 | - | 19 | 13 | 10 | -  | -  | 9 | -  | -  | -  | -  | - | -  | - |
| 496   | 1                        | 16 | - | 8 | 15 | - | - | -  | -  | -  | -  | 12 | 9 | -  | 11 | -  | -  | - | -  | - |
| 497   | 1                        | 16 | - | 8 | 15 | - | - | -  | 13 | -  | -  | -  | 9 | -  | 11 | -  | -  | - | -  | - |
| 498   | 1                        | 16 | 3 | 8 | -  | 5 | - | 19 | 13 | -  | -  | -  | 9 | -  | 11 | -  | -  | - | -  | - |
| 499   | 1                        | 16 | - | 8 | 15 | - | - | -  | -  | -  | -  | -  | 9 | -  | 11 | -  | 14 | - | -  | - |
| 500   | 1                        | -  | - | 8 | 15 | - | - | -  | -  | -  | 17 | -  | 9 | -  | 11 | -  | 14 | - | -  | - |

Table S10: Continuation of table S9.

| Model | Recoded variable indices |    |   |   |    |   |   |    |    |    |    |    |    |    |    |    |    |   |   |    |
|-------|--------------------------|----|---|---|----|---|---|----|----|----|----|----|----|----|----|----|----|---|---|----|
| 501   | 1                        | 16 | - | 8 | 15 | - | - | -  | -  | -  | 17 | -  | 9  | -  | 11 | -  | -  | - | - | -  |
| 502   | 1                        | 16 | - | 8 | 15 | - | 6 | -  | -  | -  | -  | -  | 9  | 18 | 11 | -  | -  | - | - | -  |
| 503   | 1                        | 16 | 3 | 8 | 15 | 5 | - | 19 | -  | -  | -  | -  | 9  | -  | 11 | -  | -  | - | - | -  |
| 504   | 1                        | 16 | - | 8 | 15 | - | 6 | -  | -  | -  | -  | -  | 9  | -  | 11 | -  | -  | 7 | - | 20 |
| 505   | 1                        | 16 | - | 8 | 15 | - | 6 | -  | -  | -  | -  | 12 | 9  | -  | 11 | 21 | -  | - | - | -  |
| 506   | 1                        | 16 | - | 8 | 15 | - | - | -  | 13 | -  | -  | -  | 12 | 9  | -  | -  | -  | - | - | -  |
| 507   | 1                        | 16 | 3 | 8 | -  | 5 | - | 19 | 13 | -  | -  | -  | 12 | 9  | -  | -  | -  | - | - | -  |
| 508   | 1                        | 16 | 3 | 8 | 15 | 5 | - | 19 | -  | -  | -  | -  | 12 | 9  | -  | -  | -  | - | - | -  |
| 509   | 1                        | 16 | - | 8 | 15 | - | - | -  | 13 | -  | -  | -  | 9  | -  | -  | -  | 14 | - | - | -  |
| 510   | 1                        | 16 | 3 | 8 | -  | 5 | - | 19 | 13 | -  | -  | -  | 9  | -  | -  | -  | 14 | - | - | -  |
| 511   | 1                        | 16 | - | 8 | 15 | - | - | -  | 13 | -  | 17 | -  | 9  | -  | -  | -  | -  | - | - | -  |
| 512   | 1                        | 16 | - | 8 | 15 | - | 6 | -  | 13 | -  | -  | -  | 9  | 18 | -  | -  | -  | - | - | -  |
| 513   | 1                        | 16 | 3 | 8 | 15 | 5 | - | 19 | 13 | -  | -  | -  | 9  | -  | -  | -  | -  | - | - | -  |
| 514   | 1                        | 16 | - | 8 | 15 | - | 6 | -  | 13 | -  | -  | -  | 9  | -  | -  | -  | -  | 7 | - | 20 |
| 515   | 1                        | 16 | - | 8 | 15 | - | 6 | -  | 13 | -  | -  | 12 | 9  | -  | -  | 21 | -  | - | - | -  |
| 516   | 1                        | 16 | 3 | 8 | -  | 5 | - | 19 | 13 | -  | 17 | -  | 9  | -  | -  | -  | -  | - | - | -  |
| 517   | 1                        | 16 | 3 | 8 | -  | 5 | 6 | 19 | 13 | -  | -  | -  | 9  | 18 | -  | -  | -  | - | - | -  |
| 518   | 1                        | 16 | 3 | 8 | -  | 5 | 6 | 19 | 13 | -  | -  | -  | 9  | -  | -  | -  | -  | 7 | - | 20 |
| 519   | 1                        | 16 | 3 | 8 | -  | 5 | 6 | 19 | 13 | -  | -  | 12 | 9  | -  | -  | 21 | -  | - | - | -  |
| 520   | 1                        | 16 | - | 8 | 15 | - | - | -  | -  | -  | 17 | -  | 9  | -  | -  | -  | 14 | - | - | -  |
| 521   | 1                        | 16 | 3 | 8 | 15 | 5 | - | 19 | -  | -  | 17 | -  | 9  | -  | -  | -  | -  | - | - | -  |
| 522   | 1                        | 16 | 3 | 8 | 15 | 5 | 6 | 19 | -  | -  | -  | -  | 9  | 18 | -  | -  | -  | - | - | -  |
| 523   | 1                        | 16 | 3 | 8 | 15 | 5 | 6 | 19 | -  | -  | -  | -  | 9  | -  | -  | -  | -  | 7 | - | 20 |
| 524   | 1                        | 16 | - | 8 | 15 | - | - | -  | -  | 10 | -  | 12 | -  | -  | 11 | -  | -  | - | - | -  |
| 525   | 1                        | 16 | - | 8 | 15 | - | - | -  | 13 | 10 | -  | -  | -  | -  | 11 | -  | -  | - | - | -  |
| 526   | 1                        | -  | - | 8 | 15 | - | - | -  | 13 | 10 | 17 | -  | -  | -  | 11 | -  | -  | - | - | -  |
| 527   | 1                        | 16 | - | 8 | 15 | - | - | -  | -  | 10 | -  | -  | -  | -  | 11 | -  | 14 | - | - | -  |
| 528   | 1                        | -  | - | 8 | 15 | - | - | -  | -  | 10 | 17 | -  | -  | -  | 11 | -  | 14 | - | - | -  |
| 529   | 1                        | 16 | - | 8 | 15 | - | - | -  | -  | 10 | 17 | -  | -  | -  | 11 | -  | -  | - | - | -  |
| 530   | 1                        | 16 | - | 8 | 15 | - | 6 | -  | -  | 10 | -  | -  | -  | 18 | 11 | -  | -  | - | - | -  |
| 531   | 1                        | 16 | 3 | 8 | 15 | 5 | - | 19 | -  | 10 | -  | -  | -  | -  | 11 | -  | -  | - | - | -  |
| 532   | 1                        | 16 | - | 8 | 15 | - | 6 | -  | -  | 10 | -  | -  | -  | -  | 11 | -  | -  | 7 | - | 20 |
| 533   | 1                        | 16 | - | 8 | 15 | - | 6 | -  | -  | 10 | -  | 12 | -  | -  | 11 | 21 | -  | - | - | -  |
| 534   | 1                        | 16 | - | 8 | 15 | - | - | -  | 13 | 10 | -  | 12 | -  | -  | -  | -  | -  | - | - | -  |
| 535   | 1                        | 16 | - | 8 | 15 | - | - | -  | 13 | 10 | -  | -  | -  | -  | -  | -  | 14 | - | - | -  |
| 536   | 1                        | 16 | - | 8 | 15 | - | - | -  | 13 | 10 | 17 | -  | -  | -  | -  | -  | -  | - | - | -  |
| 537   | 1                        | 16 | - | 8 | 15 | - | 6 | -  | 13 | 10 | -  | -  | -  | 18 | -  | -  | -  | - | - | -  |
| 538   | 1                        | 16 | 3 | 8 | 15 | 5 | - | 19 | 13 | 10 | -  | -  | -  | -  | -  | -  | -  | - | - | -  |
| 539   | 1                        | 16 | - | 8 | 15 | - | 6 | -  | 13 | 10 | -  | 12 | -  | -  | -  | 21 | -  | - | - | -  |
| 540   | 1                        | 16 | - | 8 | 15 | - | - | -  | -  | -  | -  | 12 | -  | -  | 11 | -  | 14 | - | - | -  |
| 541   | 1                        | -  | - | 8 | 15 | - | - | -  | -  | -  | 17 | 12 | -  | -  | 11 | -  | 14 | - | - | -  |
| 542   | 1                        | 16 | - | 8 | 15 | - | - | -  | 13 | -  | -  | -  | -  | -  | 11 | -  | 14 | - | - | -  |
| 543   | 1                        | -  | - | 8 | 15 | - | - | -  | 13 | -  | 17 | -  | -  | -  | 11 | -  | 14 | - | - | -  |
| 544   | 1                        | 16 | - | 8 | 15 | - | - | -  | 13 | -  | 17 | -  | -  | -  | 11 | -  | -  | - | - | -  |
| 545   | 1                        | 16 | - | 8 | 15 | - | 6 | -  | 13 | -  | -  | 12 | -  | -  | 11 | 21 | -  | - | - | -  |
| 546   | 1                        | 16 | - | 8 | 15 | - | - | -  | -  | -  | 17 | -  | -  | -  | 11 | -  | 14 | - | - | -  |
| 547   | 1                        | 16 | - | 8 | 15 | - | 6 | -  | -  | -  | -  | -  | -  | 18 | 11 | -  | 14 | - | - | -  |
| 548   | 1                        | 16 | 3 | 8 | 15 | 5 | - | 19 | -  | -  | -  | -  | -  | -  | 11 | -  | 14 | - | - | -  |
| 549   | 1                        | 16 | - | 8 | 15 | - | 6 | -  | -  | -  | -  | -  | -  | -  | 11 | -  | 14 | 7 | - | 20 |
| 550   | 1                        | 16 | - | 8 | 15 | - | 6 | -  | -  | -  | -  | 12 | -  | -  | 11 | 21 | 14 | - | - | -  |

Table S11: Continuation of table S10.

| Model | Recoded variable indices |    |   |   |    |   |   |    |    |    |    |    |   |    |    |    |    |   |   |    |   |
|-------|--------------------------|----|---|---|----|---|---|----|----|----|----|----|---|----|----|----|----|---|---|----|---|
| 551   | 1                        | -  | - | 8 | 15 | - | 6 | -  | -  | -  | 17 | 12 | - | -  | 11 | 21 | 14 | - | - | -  | - |
| 552   | 1                        | 16 | - | 8 | 15 | - | - | -  | 13 | -  | 17 | -  | - | -  | -  | -  | 14 | - | - | -  | - |
| 553   | 1                        | 16 | - | 8 | 15 | - | 6 | -  | 13 | -  | -  | 12 | - | -  | -  | 21 | 14 | - | - | -  | - |
| 554   | 1                        | 16 | 3 | 8 | 15 | 5 | 6 | 19 | -  | -  | 17 | -  | - | 18 | -  | -  | -  | - | - | -  | - |
| 555   | 1                        | 16 | - | - | 15 | - | - | -  | 13 | 10 | -  | -  | 9 | -  | -  | -  | 14 | - | - | -  | - |
| 556   | 1                        | 16 | - | - | 15 | - | - | -  | 13 | -  | 17 | -  | 9 | -  | 11 | -  | -  | - | - | -  | - |
| 557   | 1                        | 16 | - | - | 15 | - | 6 | -  | -  | -  | 17 | -  | 9 | -  | 11 | -  | -  | 7 | - | 20 | - |
| 558   | 1                        | 16 | - | - | 15 | - | - | -  | 13 | -  | 17 | -  | 9 | -  | -  | -  | 14 | - | - | -  | - |
| 559   | 1                        | -  | - | - | 15 | - | 6 | -  | -  | 10 | 17 | 12 | - | -  | 11 | -  | -  | 7 | - | 20 | - |
| 560   | 1                        | -  | - | - | 15 | - | 6 | -  | -  | 10 | 17 | -  | - | -  | 11 | -  | 14 | 7 | - | 20 | - |
| 561   | 1                        | 16 | - | - | 15 | - | 6 | -  | -  | 10 | 17 | -  | - | -  | 11 | -  | -  | 7 | - | 20 | - |
| 562   | 1                        | -  | - | - | 15 | - | 6 | -  | -  | 10 | 17 | 12 | - | -  | 11 | 21 | -  | 7 | - | 20 | - |
| 563   | 1                        | 16 | - | - | 15 | - | - | -  | 13 | 10 | 17 | -  | - | -  | -  | -  | 14 | - | - | -  | - |
| 564   | 1                        | 16 | 3 | - | 15 | 5 | 6 | -  | -  | -  | -  | 12 | - | 18 | -  | 21 | -  | - | - | -  | 2 |
| 565   | 1                        | 16 | 3 | - | 15 | - | 6 | -  | 13 | -  | -  | 12 | - | 18 | -  | 21 | -  | - | - | -  | 2 |
| 566   | 1                        | 16 | 3 | - | 15 | 5 | 6 | 19 | -  | -  | 17 | -  | - | 18 | -  | -  | -  | - | - | -  | 2 |
| 567   | 1                        | 16 | 3 | - | 15 | 5 | 6 | 19 | -  | -  | -  | 12 | - | 18 | -  | 21 | -  | - | - | -  | 2 |
| 568   | 1                        | 16 | - | 8 | 15 | 5 | 6 | -  | -  | -  | 17 | -  | - | 18 | -  | -  | -  | - | - | -  | 2 |
| 569   | 1                        | 16 | - | - | 15 | 5 | 6 | -  | -  | -  | 17 | -  | 9 | 18 | -  | -  | -  | - | - | -  | 2 |
| 570   | -                        | 16 | - | - | 15 | 5 | 6 | -  | -  | -  | 17 | -  | 9 | -  | -  | -  | -  | 7 | - | 20 | 2 |
| 571   | 1                        | 16 | - | 8 | 15 | - | 6 | -  | 13 | -  | -  | -  | 9 | 18 | -  | -  | -  | - | - | -  | 2 |
| 572   | 1                        | 16 | 3 | 8 | 15 | 5 | 6 | 19 | -  | -  | -  | -  | 9 | 18 | -  | -  | -  | - | - | -  | 2 |
| 573   | 1                        | 16 | - | 8 | 15 | - | 6 | -  | 13 | 10 | -  | -  | - | 18 | -  | -  | -  | - | - | -  | 2 |
| 574   | 1                        | 16 | 3 | 8 | 15 | 5 | 6 | 19 | -  | -  | 17 | -  | - | 18 | -  | -  | -  | - | - | -  | 2 |
| 575   | -                        | 16 | 3 | - | -  | 5 | 6 | -  | 13 | -  | -  | -  | 9 | -  | -  | -  | -  | - | 4 | -  | - |
| 576   | -                        | 16 | 3 | - | -  | 5 | 6 | -  | 13 | -  | 17 | -  | - | -  | -  | -  | -  | - | 4 | -  | - |
| 577   | 1                        | 16 | 3 | - | 15 | 5 | 6 | -  | -  | -  | -  | 12 | - | 18 | -  | 21 | -  | - | 4 | -  | - |
| 578   | -                        | 16 | 3 | - | -  | - | 6 | -  | 13 | -  | 17 | -  | - | -  | -  | -  | 14 | - | 4 | -  | - |
| 579   | -                        | 16 | 3 | - | 15 | - | 6 | -  | 13 | -  | 17 | -  | - | -  | -  | -  | -  | - | 4 | -  | - |
| 580   | -                        | 16 | 3 | - | -  | 5 | 6 | 19 | 13 | -  | 17 | -  | - | -  | -  | -  | -  | - | 4 | -  | - |
| 581   | -                        | 16 | 3 | - | -  | - | 6 | -  | 13 | -  | 17 | 12 | - | -  | -  | 21 | -  | - | 4 | -  | - |
| 582   | 1                        | 16 | 3 | - | -  | - | 6 | -  | 13 | -  | -  | 12 | - | 18 | -  | 21 | -  | - | 4 | -  | - |
| 583   | 1                        | 16 | 3 | 8 | 15 | - | 6 | -  | -  | -  | -  | 12 | - | 18 | -  | 21 | -  | - | 4 | -  | - |
| 584   | 1                        | 16 | 3 | - | 15 | - | 6 | -  | 13 | -  | -  | 12 | - | 18 | -  | 21 | -  | - | 4 | -  | - |
| 585   | 1                        | 16 | 3 | - | 15 | 5 | 6 | 19 | -  | -  | 17 | -  | - | 18 | -  | -  | -  | - | 4 | -  | - |
| 586   | 1                        | 16 | 3 | - | 15 | 5 | 6 | 19 | -  | -  | -  | 12 | - | 18 | -  | 21 | -  | - | 4 | -  | - |
| 587   | -                        | 16 | 3 | - | -  | 5 | 6 | -  | 13 | -  | 17 | -  | - | -  | -  | -  | -  | 7 | - | -  | - |
| 588   | -                        | 16 | 3 | - | -  | 5 | 6 | -  | 13 | -  | 17 | -  | - | -  | -  | -  | 14 | - | - | -  | - |
| 589   | 1                        | 16 | 3 | - | -  | 5 | 6 | -  | 13 | -  | 17 | -  | - | 18 | -  | -  | -  | - | - | -  | - |
| 590   | -                        | 16 | 3 | - | -  | 5 | 6 | -  | 13 | -  | 17 | -  | - | -  | -  | -  | -  | 7 | - | 20 | - |
| 591   | 1                        | 16 | 3 | - | -  | 5 | 6 | -  | 13 | -  | -  | 12 | - | 18 | -  | 21 | -  | - | - | -  | - |
| 592   | -                        | 16 | 3 | 8 | 15 | 5 | - | -  | 13 | -  | 17 | -  | - | -  | -  | -  | -  | - | - | -  | - |
| 593   | 1                        | 16 | 3 | 8 | -  | 5 | 6 | -  | 13 | -  | 17 | -  | - | 18 | -  | -  | -  | - | - | -  | - |
| 594   | 1                        | 16 | 3 | 8 | -  | 5 | 6 | -  | 13 | -  | -  | 12 | - | 18 | -  | 21 | -  | - | - | -  | - |
| 595   | 1                        | 16 | 3 | 8 | 15 | 5 | 6 | -  | -  | -  | 17 | -  | - | 18 | -  | -  | -  | - | - | -  | - |
| 596   | 1                        | 16 | 3 | 8 | 15 | 5 | 6 | -  | -  | -  | -  | 12 | - | 18 | -  | 21 | -  | - | - | -  | - |
| 597   | 1                        | 16 | 3 | - | -  | 5 | 6 | -  | 13 | -  | 17 | -  | 9 | 18 | -  | -  | -  | - | - | -  | - |
| 598   | -                        | 16 | 3 | - | 15 | 5 | - | -  | 13 | -  | 17 | -  | - | -  | -  | -  | 14 | - | - | -  | - |
| 599   | 1                        | 16 | 3 | - | 15 | 5 | 6 | -  | 13 | -  | 17 | -  | - | 18 | -  | -  | -  | - | - | -  | - |
| 600   | 1                        | 16 | 3 | - | 15 | 5 | 6 | -  | 13 | -  | -  | 12 | - | 18 | -  | 21 | -  | - | - | -  | - |

Table S12: Continuation of table S11.

| Model | Recoded variable indices |    |   |   |    |   |   |    |    |    |    |    |   |    |   |    |    |   |   |    |
|-------|--------------------------|----|---|---|----|---|---|----|----|----|----|----|---|----|---|----|----|---|---|----|
| 601   | 1                        | 16 | 3 | - | -  | 5 | 6 | -  | 13 | -  | 17 | 12 | - | 18 | - | 21 | -  | - | - | -  |
| 602   | 1                        | 16 | 3 | - | 15 | 5 | 6 | -  | -  | -  | -  | 12 | - | 18 | - | 21 | 14 | - | - | -  |
| 603   | 1                        | 16 | 3 | - | 15 | 5 | 6 | -  | -  | -  | 17 | 12 | - | 18 | - | 21 | -  | - | - | -  |
| 604   | 1                        | 16 | 3 | - | 15 | 5 | 6 | 19 | -  | -  | -  | 12 | - | 18 | - | 21 | -  | - | - | -  |
| 605   | 1                        | 16 | 3 | - | 15 | 5 | 6 | -  | -  | -  | -  | 12 | - | 18 | - | 21 | -  | 7 | - | 20 |
| 606   | -                        | 16 | 3 | 8 | 15 | - | 6 | -  | 13 | -  | -  | -  | - | -  | - | -  | 14 | - | - | -  |
| 607   | 1                        | 16 | 3 | 8 | -  | - | 6 | -  | 13 | -  | -  | 12 | - | 18 | - | 21 | -  | - | - | -  |
| 608   | -                        | 16 | 3 | - | 15 | - | 6 | -  | 13 | -  | -  | -  | 9 | -  | - | -  | 14 | - | - | -  |
| 609   | -                        | 16 | 3 | - | 15 | - | 6 | -  | 13 | 10 | -  | -  | - | -  | - | -  | 14 | - | - | -  |
| 610   | -                        | 16 | 3 | - | 15 | - | 6 | -  | 13 | -  | 17 | -  | - | -  | - | -  | 14 | - | - | -  |
| 611   | -                        | 16 | 3 | - | 15 | 5 | 6 | 19 | 13 | -  | -  | -  | - | -  | - | -  | 14 | - | - | -  |
| 612   | -                        | 16 | 3 | - | 15 | - | 6 | -  | 13 | -  | -  | 12 | - | -  | - | 21 | 14 | - | - | -  |
| 613   | 1                        | 16 | 3 | - | -  | - | 6 | -  | 13 | -  | -  | 12 | - | 18 | - | 21 | 14 | - | - | -  |
| 614   | 1                        | 16 | 3 | - | 15 | - | 6 | -  | 13 | -  | -  | 12 | - | 18 | - | 21 | -  | - | - | -  |
| 615   | 1                        | 16 | 3 | - | -  | 5 | 6 | 19 | 13 | -  | 17 | -  | - | 18 | - | -  | -  | - | - | -  |
| 616   | 1                        | 16 | 3 | - | -  | 5 | 6 | 19 | 13 | -  | -  | 12 | - | 18 | - | 21 | -  | - | - | -  |
| 617   | -                        | 16 | 3 | - | -  | 5 | 6 | 19 | 13 | -  | -  | 12 | - | -  | - | 21 | -  | 7 | - | 20 |
| 618   | 1                        | 16 | 3 | - | 15 | 5 | 6 | 19 | -  | -  | 17 | -  | - | 18 | - | -  | -  | - | - | -  |
| 619   | 1                        | 16 | 3 | - | 15 | 5 | 6 | 19 | -  | -  | -  | 12 | - | 18 | - | 21 | -  | - | - | -  |
| 620   | -                        | 16 | 3 | 8 | 15 | 5 | - | 19 | -  | -  | -  | -  | - | -  | - | -  | 14 | 7 | - | -  |
| 621   | 1                        | 16 | 3 | 8 | -  | 5 | 6 | 19 | -  | -  | 17 | -  | - | 18 | - | -  | -  | 7 | - | -  |
| 622   | 1                        | 16 | 3 | 8 | -  | 5 | 6 | 19 | -  | -  | -  | -  | - | 18 | - | -  | -  | 7 | - | 20 |
| 623   | 1                        | 16 | 3 | - | 15 | 5 | 6 | 19 | -  | -  | -  | -  | 9 | 18 | - | -  | -  | 7 | - | -  |
| 624   | 1                        | 16 | 3 | - | 15 | - | 6 | -  | 13 | -  | 17 | -  | - | 18 | - | -  | -  | 7 | - | -  |
| 625   | 1                        | 16 | 3 | - | 15 | - | 6 | -  | 13 | -  | -  | 12 | - | 18 | - | 21 | -  | 7 | - | -  |
| 626   | 1                        | 16 | 3 | - | -  | 5 | 6 | 19 | 13 | -  | -  | 12 | - | 18 | - | 21 | -  | 7 | - | -  |
| 627   | -                        | 16 | 3 | - | -  | 5 | 6 | 19 | 13 | -  | -  | 12 | - | -  | - | 21 | -  | 7 | - | 20 |
| 628   | 1                        | 16 | 3 | - | 15 | 5 | 6 | 19 | -  | -  | -  | 12 | - | 18 | - | 21 | -  | 7 | - | -  |
| 629   | 1                        | 16 | 3 | 8 | 15 | - | 6 | -  | 13 | -  | -  | -  | 9 | 18 | - | -  | -  | - | - | -  |
| 630   | 1                        | 16 | 3 | 8 | 15 | - | 6 | -  | 13 | 10 | -  | -  | - | 18 | - | -  | -  | - | - | -  |
| 631   | 1                        | -  | 3 | 8 | 15 | - | 6 | -  | 13 | 10 | 17 | -  | - | 18 | - | -  | -  | - | - | -  |
| 632   | 1                        | 16 | 3 | 8 | -  | - | 6 | -  | 13 | 10 | -  | 12 | - | 18 | - | 21 | -  | - | - | -  |
| 633   | 1                        | 16 | 3 | 8 | 15 | - | 6 | -  | 13 | -  | -  | 12 | - | 18 | - | 21 | -  | - | - | -  |
| 634   | 1                        | 16 | 3 | 8 | -  | 5 | 6 | 19 | 13 | -  | 17 | -  | - | 18 | - | -  | -  | - | - | -  |
| 635   | 1                        | 16 | 3 | 8 | -  | - | 6 | -  | 13 | -  | 17 | 12 | - | 18 | - | 21 | -  | - | - | -  |
| 636   | 1                        | 16 | 3 | 8 | -  | 5 | 6 | 19 | 13 | -  | -  | 12 | - | 18 | - | 21 | -  | - | - | -  |
| 637   | 1                        | 16 | 3 | 8 | 15 | - | 6 | -  | -  | -  | 17 | -  | - | 18 | - | -  | 14 | - | - | -  |
| 638   | 1                        | 16 | 3 | 8 | 15 | 5 | 6 | 19 | -  | -  | 17 | -  | - | 18 | - | -  | -  | - | - | -  |
| 639   | 1                        | 16 | 3 | 8 | 15 | 5 | 6 | 19 | -  | -  | -  | -  | - | 18 | - | -  | -  | 7 | - | 20 |
| 640   | 1                        | 16 | 3 | 8 | 15 | 5 | 6 | 19 | -  | -  | -  | 12 | - | 18 | - | 21 | -  | - | - | -  |
| 641   | 1                        | 16 | 3 | - | 15 | - | 6 | -  | 13 | 10 | -  | -  | 9 | 18 | - | -  | -  | - | - | -  |
| 642   | 1                        | 16 | 3 | - | 15 | - | 6 | -  | 13 | -  | 17 | -  | 9 | 18 | - | -  | -  | - | - | -  |
| 643   | 1                        | 16 | 3 | - | 15 | - | 6 | -  | 13 | -  | -  | 12 | 9 | 18 | - | 21 | -  | - | - | -  |
| 644   | 1                        | 16 | 3 | - | -  | 5 | 6 | 19 | 13 | -  | 17 | -  | 9 | 18 | - | -  | -  | - | - | -  |
| 645   | 1                        | 16 | 3 | - | 15 | 5 | 6 | 19 | -  | -  | 17 | -  | 9 | 18 | - | -  | -  | - | - | -  |
| 646   | 1                        | 16 | 3 | - | 15 | 5 | 6 | 19 | -  | -  | -  | 12 | 9 | 18 | - | 21 | -  | - | - | -  |
| 647   | 1                        | 16 | 3 | - | 15 | - | 6 | -  | 13 | 10 | -  | -  | - | 18 | - | -  | 14 | - | - | -  |
| 648   | 1                        | 16 | 3 | - | 15 | - | 6 | -  | 13 | 10 | 17 | -  | - | 18 | - | -  | -  | - | - | -  |
| 649   | 1                        | 16 | 3 | - | 15 | - | 6 | -  | 13 | 10 | -  | 12 | - | 18 | - | 21 | -  | - | - | -  |
| 650   | 1                        | 16 | 3 | - | -  | 5 | 6 | 19 | 13 | 10 | 17 | -  | - | 18 | - | -  | -  | - | - | -  |

Table S13: Continuation of table S12.

| Model | Recoded variable indices |    |   |   |    |   |   |    |    |    |    |    |   |    |    |    |    |   |    |
|-------|--------------------------|----|---|---|----|---|---|----|----|----|----|----|---|----|----|----|----|---|----|
| 651   | 1                        | 16 | 3 | - | 15 | 5 | 6 | 19 | -  | 10 | -  | 12 | - | 18 | -  | 21 | -  | - | -  |
| 652   | 1                        | 16 | 3 | - | 15 | - | 6 | -  | 13 | -  | 17 | -  | - | 18 | 11 | -  | -  | - | -  |
| 653   | 1                        | 16 | 3 | - | 15 | - | 6 | -  | 13 | -  | -  | 12 | - | 18 | 11 | 21 | -  | - | -  |
| 654   | 1                        | 16 | 3 | - | 15 | - | 6 | -  | -  | -  | -  | 12 | - | 18 | 11 | 21 | 14 | - | -  |
| 655   | 1                        | 16 | 3 | - | 15 | 5 | 6 | 19 | -  | -  | 17 | -  | - | 18 | 11 | -  | -  | - | -  |
| 656   | 1                        | 16 | 3 | - | 15 | 5 | 6 | 19 | -  | -  | -  | 12 | - | 18 | 11 | 21 | -  | - | -  |
| 657   | 1                        | 16 | 3 | - | 15 | - | 6 | -  | 13 | -  | -  | 12 | - | 18 | -  | 21 | -  | - | -  |
| 658   | 1                        | 16 | 3 | - | 15 | 5 | 6 | 19 | -  | -  | 17 | 12 | - | 18 | -  | -  | -  | - | -  |
| 659   | 1                        | 16 | 3 | - | 15 | 5 | 6 | 19 | -  | -  | -  | 12 | - | 18 | -  | 21 | -  | - | -  |
| 660   | 1                        | 16 | 3 | - | 15 | - | 6 | -  | 13 | -  | 17 | -  | - | 18 | -  | -  | 14 | - | -  |
| 661   | 1                        | 16 | 3 | - | 15 | - | 6 | -  | 13 | -  | -  | 12 | - | 18 | -  | 21 | 14 | - | -  |
| 662   | 1                        | 16 | 3 | - | -  | 5 | 6 | 19 | 13 | -  | 17 | -  | - | 18 | -  | -  | 14 | - | -  |
| 663   | 1                        | 16 | 3 | - | 15 | 5 | 6 | 19 | 13 | -  | 17 | -  | - | 18 | -  | -  | -  | - | -  |
| 664   | 1                        | 16 | 3 | - | 15 | - | 6 | -  | 13 | -  | 17 | 12 | - | 18 | -  | 21 | -  | - | -  |
| 665   | 1                        | 16 | 3 | - | 15 | 5 | 6 | 19 | 13 | -  | -  | 12 | - | 18 | -  | 21 | -  | - | -  |
| 666   | 1                        | 16 | 3 | - | 15 | - | 6 | -  | 13 | -  | -  | 12 | - | 18 | -  | 21 | -  | 7 | 20 |
| 667   | -                        | 16 | 3 | - | 15 | 5 | 6 | 19 | 13 | -  | -  | 12 | - | -  | -  | 21 | -  | 7 | 20 |
| 668   | 1                        | 16 | 3 | - | -  | 5 | 6 | 19 | 13 | -  | 17 | 12 | - | 18 | -  | 21 | -  | - | -  |
| 669   | 1                        | 16 | 3 | - | 15 | 5 | 6 | 19 | -  | -  | 17 | -  | - | 18 | -  | -  | 14 | - | -  |
| 670   | 1                        | 16 | 3 | - | 15 | 5 | 6 | 19 | -  | -  | -  | 12 | - | 18 | -  | 21 | 14 | - | -  |
| 671   | 1                        | 16 | 3 | - | 15 | 5 | 6 | 19 | -  | -  | 17 | -  | - | 18 | -  | -  | -  | 7 | 20 |
| 672   | 1                        | 16 | 3 | - | 15 | 5 | 6 | 19 | -  | -  | 17 | 12 | - | 18 | -  | 21 | -  | - | -  |
| 673   | 1                        | 16 | 3 | - | 15 | 5 | 6 | 19 | -  | -  | -  | 12 | - | 18 | -  | 21 | -  | 7 | 20 |
| 674   | 1                        | 16 | - | 8 | 15 | 5 | 6 | -  | -  | -  | 17 | -  | - | 18 | -  | -  | -  | - | 4  |
| 675   | 1                        | 16 | - | 8 | 15 | - | 6 | -  | 13 | -  | -  | -  | 9 | 18 | -  | -  | -  | - | 4  |
| 676   | 1                        | 16 | - | 8 | 15 | - | 6 | -  | -  | -  | 17 | -  | 9 | 18 | -  | -  | -  | - | 4  |
| 677   | 1                        | 16 | - | 8 | 15 | - | 6 | -  | -  | 10 | 17 | -  | - | 18 | -  | -  | -  | - | 4  |
| 678   | 1                        | 16 | 3 | 8 | 15 | 5 | 6 | 19 | -  | -  | 17 | -  | - | 18 | -  | -  | -  | - | 4  |
| 679   | 1                        | 16 | - | 8 | 15 | 5 | 6 | -  | -  | -  | 17 | -  | - | 18 | -  | -  | -  | - | -  |
| 680   | -                        | 16 | - | - | 15 | 5 | 6 | -  | 13 | -  | 17 | -  | - | -  | -  | -  | 14 | - | -  |
| 681   | -                        | 16 | - | 8 | 15 | 5 | - | -  | 13 | 10 | -  | -  | - | -  | -  | -  | -  | 7 | -  |
| 682   | 1                        | 16 | - | 8 | 15 | 5 | 6 | -  | -  | -  | 17 | -  | - | 18 | -  | -  | -  | 7 | -  |
| 683   | -                        | 16 | - | - | 15 | 5 | - | -  | 13 | -  | 17 | -  | 9 | -  | -  | -  | -  | 7 | -  |
| 684   | 1                        | 16 | - | - | 15 | 5 | 6 | -  | -  | -  | 17 | -  | 9 | 18 | -  | -  | -  | 7 | -  |
| 685   | 1                        | 16 | - | 8 | 15 | 5 | 6 | -  | 13 | -  | -  | -  | 9 | 18 | -  | -  | -  | - | -  |
| 686   | 1                        | 16 | - | 8 | 15 | 5 | 6 | -  | -  | -  | 17 | -  | 9 | 18 | -  | -  | -  | - | -  |
| 687   | 1                        | 16 | - | 8 | 15 | 5 | 6 | -  | 13 | 10 | -  | -  | - | 18 | -  | -  | -  | - | -  |
| 688   | 1                        | 16 | - | 8 | 15 | 5 | 6 | -  | -  | 10 | 17 | -  | - | 18 | -  | -  | -  | - | -  |
| 689   | 1                        | 16 | - | 8 | 15 | 5 | 6 | -  | -  | -  | 17 | -  | - | 18 | 11 | -  | -  | - | -  |
| 690   | -                        | 16 | - | 8 | 15 | 5 | - | -  | 13 | -  | 17 | 12 | - | -  | -  | -  | -  | - | -  |
| 691   | 1                        | 16 | - | 8 | 15 | 5 | 6 | -  | -  | -  | 17 | 12 | - | 18 | -  | -  | -  | - | -  |
| 692   | -                        | 16 | - | 8 | 15 | 5 | - | -  | 13 | -  | 17 | -  | - | -  | -  | -  | 14 | - | -  |
| 693   | 1                        | 16 | - | 8 | 15 | 5 | 6 | -  | 13 | -  | 17 | -  | - | 18 | -  | -  | -  | - | -  |
| 694   | 1                        | 16 | - | 8 | 15 | 5 | 6 | -  | -  | -  | 17 | -  | - | 18 | -  | -  | 14 | - | -  |
| 695   | 1                        | 16 | 3 | 8 | 15 | 5 | 6 | 19 | -  | -  | 17 | -  | - | 18 | -  | -  | -  | - | -  |
| 696   | 1                        | 16 | - | 8 | 15 | 5 | 6 | -  | -  | -  | 17 | -  | - | 18 | -  | -  | -  | 7 | 20 |
| 697   | 1                        | 16 | - | 8 | 15 | 5 | 6 | -  | -  | -  | 17 | 12 | - | 18 | -  | 21 | -  | - | -  |
| 698   | 1                        | 16 | - | 8 | 15 | - | 6 | -  | 13 | -  | -  | -  | 9 | 18 | -  | -  | -  | - | -  |
| 699   | -                        | 16 | - | - | 15 | - | 6 | -  | 13 | -  | 17 | -  | 9 | -  | -  | -  | 14 | - | -  |
| 700   | -                        | 16 | - | - | 15 | - | 6 | -  | 13 | 10 | 17 | -  | - | -  | -  | -  | 14 | - | -  |

Table S14: Continuation of table S13.

| Model | Recoded variable indices |    |   |   |    |   |   |    |    |    |    |    |   |    |    |    |    |   |   |    |   |
|-------|--------------------------|----|---|---|----|---|---|----|----|----|----|----|---|----|----|----|----|---|---|----|---|
| 701   | -                        | 16 | - | - | 15 | - | 6 | -  | 13 | -  | 17 | -  | - | -  | 11 | -  | 14 | - | - | -  | - |
| 702   | -                        | 16 | 3 | - | 15 | 5 | 6 | 19 | 13 | -  | 17 | -  | - | -  | -  | -  | 14 | - | - | -  | - |
| 703   | 1                        | 16 | - | 8 | 15 | - | 6 | -  | 13 | -  | -  | -  | 9 | 18 | -  | -  | -  | 7 | - | -  | - |
| 704   | 1                        | 16 | - | 8 | 15 | - | 6 | -  | 13 | 10 | -  | -  | - | 18 | -  | -  | -  | 7 | - | -  | - |
| 705   | 1                        | 16 | - | 8 | 15 | - | 6 | -  | 13 | 10 | -  | -  | 9 | 18 | -  | -  | -  | - | - | -  | - |
| 706   | 1                        | 16 | - | 8 | 15 | - | 6 | -  | 13 | -  | -  | -  | 9 | 18 | 11 | -  | -  | - | - | -  | - |
| 707   | 1                        | 16 | - | 8 | 15 | - | 6 | -  | -  | -  | 17 | -  | 9 | 18 | 11 | -  | -  | - | - | -  | - |
| 708   | 1                        | 16 | - | 8 | 15 | - | 6 | -  | 13 | -  | -  | 12 | 9 | 18 | -  | -  | -  | - | - | -  | - |
| 709   | 1                        | 16 | - | 8 | 15 | - | 6 | -  | -  | -  | 17 | 12 | 9 | 18 | -  | -  | -  | - | - | -  | - |
| 710   | 1                        | 16 | - | 8 | 15 | - | 6 | -  | 13 | -  | -  | -  | 9 | 18 | -  | -  | 14 | - | - | -  | - |
| 711   | 1                        | 16 | - | 8 | 15 | - | 6 | -  | 13 | -  | 17 | -  | 9 | 18 | -  | -  | -  | - | - | -  | - |
| 712   | 1                        | 16 | 3 | 8 | 15 | 5 | 6 | 19 | 13 | -  | -  | -  | 9 | 18 | -  | -  | -  | - | - | -  | - |
| 713   | 1                        | 16 | - | 8 | 15 | - | 6 | -  | 13 | -  | -  | -  | 9 | 18 | -  | -  | -  | 7 | - | 20 | - |
| 714   | 1                        | 16 | - | 8 | 15 | - | 6 | -  | 13 | -  | -  | 12 | 9 | 18 | -  | 21 | -  | - | - | -  | - |
| 715   | 1                        | 16 | - | 8 | 15 | - | 6 | -  | -  | -  | 17 | -  | 9 | 18 | -  | -  | 14 | - | - | -  | - |
| 716   | 1                        | 16 | 3 | 8 | 15 | 5 | 6 | 19 | -  | -  | 17 | -  | 9 | 18 | -  | -  | -  | - | - | -  | - |
| 717   | 1                        | 16 | - | 8 | 15 | - | 6 | -  | -  | -  | 17 | 12 | 9 | 18 | -  | 21 | -  | - | - | -  | - |
| 718   | 1                        | 16 | - | 8 | 15 | - | 6 | -  | -  | 10 | 17 | -  | - | 18 | 11 | -  | -  | - | - | -  | - |
| 719   | 1                        | 16 | - | 8 | 15 | - | 6 | -  | 13 | 10 | 17 | -  | - | 18 | -  | -  | -  | - | - | -  | - |
| 720   | 1                        | 16 | 3 | 8 | 15 | 5 | 6 | 19 | 13 | 10 | -  | -  | - | 18 | -  | -  | -  | - | - | -  | - |
| 721   | 1                        | 16 | - | 8 | 15 | - | 6 | -  | 13 | 10 | -  | 12 | - | 18 | -  | 21 | -  | - | - | -  | - |
| 722   | 1                        | 16 | 3 | 8 | 15 | 5 | 6 | 19 | -  | 10 | 17 | -  | - | 18 | -  | -  | -  | - | - | -  | - |
| 723   | 1                        | 16 | - | 8 | 15 | - | 6 | -  | -  | -  | 17 | 12 | - | 18 | 11 | -  | -  | - | - | -  | - |
| 724   | 1                        | 16 | - | 8 | 15 | - | 6 | -  | 13 | -  | 17 | -  | - | 18 | 11 | -  | -  | - | - | -  | - |
| 725   | 1                        | 16 | - | 8 | 15 | - | 6 | -  | -  | -  | 17 | -  | - | 18 | 11 | -  | 14 | - | - | -  | - |
| 726   | 1                        | 16 | 3 | 8 | 15 | 5 | 6 | 19 | -  | -  | 17 | -  | - | 18 | 11 | -  | -  | - | - | -  | - |
| 727   | -                        | 16 | 3 | 8 | 15 | 5 | - | 19 | 13 | -  | 17 | -  | - | -  | -  | -  | 14 | - | - | -  | - |
| 728   | 1                        | 16 | 3 | 8 | 15 | 5 | 6 | 19 | 13 | -  | 17 | -  | - | 18 | -  | -  | -  | - | - | -  | - |
| 729   | 1                        | 16 | 3 | 8 | 15 | 5 | 6 | 19 | -  | -  | 17 | -  | - | 18 | -  | -  | 14 | - | - | -  | - |

Table S15: Continuation of table S14.



| A  | B |      |      |      |      |      |      |      |      |      |      |      |      |      |      |      |      |      |      |      |      |
|----|---|------|------|------|------|------|------|------|------|------|------|------|------|------|------|------|------|------|------|------|------|
|    | 1 | 16   | 3    | 8    | 15   | 5    | 6    | 19   | 13   | 10   | 17   | 12   | 9    | 18   | 11   | 21   | 14   | 7    | 4    | 20   | 2    |
| 1  | - | 0.90 | 0.72 | 0.60 | 0.58 | 0.58 | 0.50 | 0.40 | 0.29 | 0.31 | 0.26 | 0.26 | 0.26 | 0.25 | 0.22 | 0.19 | 0.17 | 0.17 | 0.14 | 0.09 | 0.08 |
| 16 | - | -    | 0.72 | 0.57 | 0.55 | 0.60 | 0.51 | 0.41 | 0.33 | 0.28 | 0.25 | 0.26 | 0.25 | 0.25 | 0.18 | 0.20 | 0.17 | 0.17 | 0.12 | 0.09 | 0.08 |
| 3  | - | -    | -    | 0.41 | 0.36 | 0.53 | 0.40 | 0.41 | 0.23 | 0.23 | 0.17 | 0.22 | 0.15 | 0.18 | 0.13 | 0.17 | 0.13 | 0.14 | 0.11 | 0.07 | 0.06 |
| 8  | - | -    | -    | -    | 0.32 | 0.37 | 0.29 | 0.26 | 0.18 | 0.18 | 0.15 | 0.14 | 0.17 | 0.15 | 0.14 | 0.09 | 0.10 | 0.09 | 0.09 | 0.04 | 0.05 |
| 15 | - | -    | -    | -    | -    | 0.29 | 0.32 | 0.17 | 0.20 | 0.19 | 0.22 | 0.15 | 0.19 | 0.19 | 0.17 | 0.11 | 0.14 | 0.08 | 0.08 | 0.05 | 0.04 |
| 5  | - | -    | -    | -    | -    | -    | 0.31 | 0.41 | 0.16 | 0.13 | 0.16 | 0.15 | 0.15 | 0.16 | 0.06 | 0.11 | 0.09 | 0.13 | 0.05 | 0.07 | 0.05 |
| 6  | - | -    | -    | -    | -    | -    | -    | 0.21 | 0.19 | 0.14 | 0.17 | 0.21 | 0.11 | 0.25 | 0.08 | 0.20 | 0.08 | 0.12 | 0.07 | 0.09 | 0.02 |
| 19 | - | -    | -    | -    | -    | -    | -    | -    | 0.09 | 0.07 | 0.08 | 0.10 | 0.09 | 0.10 | 0.05 | 0.07 | 0.06 | 0.10 | 0.04 | 0.05 | 0.04 |
| 13 | - | -    | -    | -    | -    | -    | -    | -    | -    | 0.08 | 0.10 | 0.10 | 0.10 | 0.10 | 0.03 | 0.09 | 0.06 | 0.04 | 0.04 | 0.02 | 0.02 |
| 10 | - | -    | -    | -    | -    | -    | -    | -    | -    | -    | 0.07 | 0.07 | 0.02 | 0.05 | 0.09 | 0.04 | 0.03 | 0.05 | 0.07 | 0.03 | 0.02 |
| 17 | - | -    | -    | -    | -    | -    | -    | -    | -    | -    | -    | 0.04 | 0.06 | 0.10 | 0.06 | 0.02 | 0.06 | 0.04 | 0.05 | 0.02 | 0.01 |
| 12 | - | -    | -    | -    | -    | -    | -    | -    | -    | -    | -    | -    | 0.04 | 0.09 | 0.04 | 0.20 | 0.03 | 0.04 | 0.03 | 0.03 | 0.01 |
| 9  | - | -    | -    | -    | -    | -    | -    | -    | -    | -    | -    | -    | -    | 0.06 | 0.05 | 0.02 | 0.03 | 0.04 | 0.02 | 0.02 | 0.02 |
| 18 | - | -    | -    | -    | -    | -    | -    | -    | -    | -    | -    | -    | -    | -    | 0.03 | 0.08 | 0.03 | 0.03 | 0.02 | 0.01 | 0.02 |
| 11 | - | -    | -    | -    | -    | -    | -    | -    | -    | -    | -    | -    | -    | -    | -    | 0.02 | 0.06 | 0.03 | 0.02 | 0.02 | 0.01 |
| 21 | - | -    | -    | -    | -    | -    | -    | -    | -    | -    | -    | -    | -    | -    | -    | -    | 0.02 | 0.03 | 0.02 | 0.02 | 0.01 |
| 14 | - | -    | -    | -    | -    | -    | -    | -    | -    | -    | -    | -    | -    | -    | -    | -    | -    | 0.02 | 0.01 | 0.01 | 0.01 |
| 7  | - | -    | -    | -    | -    | -    | -    | -    | -    | -    | -    | -    | -    | -    | -    | -    | -    | -    | 0.02 | 0.09 | 0.01 |
| 4  | - | -    | -    | -    | -    | -    | -    | -    | -    | -    | -    | -    | -    | -    | -    | -    | -    | -    | -    | 0.01 | 0.00 |
| 20 | - | -    | -    | -    | -    | -    | -    | -    | -    | -    | -    | -    | -    | -    | -    | -    | -    | -    | -    | -    | 0.00 |
| 2  | - | -    | -    | -    | -    | -    | -    | -    | -    | -    | -    | -    | -    | -    | -    | -    | -    | -    | -    | -    | -    |

Table S16: Proportion of models containing A and B. 1=7235, 2=11642, 3=25125, 4=25470, 5=25744, 6=27642, 7=27920, 8=29679, 9=33385, 10=36409, 11=37443, 12=44276, 13=45991, 14=46771, 15=48415, 16=48433, 17=48549, 18=interaction between 27642 and 7235, 19=interaction between 25744 and 25125, 20=interaction between 27920 and 27642, 21=interaction between 27642 and 44276.

| A  | B |      |      |      |      |      |      |      |      |      |      |      |      |      |      |      |      |      |      |      |      |      |
|----|---|------|------|------|------|------|------|------|------|------|------|------|------|------|------|------|------|------|------|------|------|------|
|    | 1 | 16   | 3    | 8    | 15   | 5    | 6    | 19   | 13   | 10   | 17   | 12   | 9    | 18   | 11   | 21   | 14   | 7    | 4    | 20   | 2    |      |
| 1  | - | 0.06 | 0.24 | 0.35 | 0.38 | 0.38 | 0.46 | 0.55 | 0.66 | 0.65 | 0.70 | 0.69 | 0.70 | 0.70 | 0.74 | 0.76 | 0.79 | 0.79 | 0.82 | 0.87 | 0.88 |      |
| 16 | - | -    | 0.22 | 0.37 | 0.39 | 0.34 | 0.43 | 0.53 | 0.62 | 0.67 | 0.70 | 0.68 | 0.69 | 0.70 | 0.76 | 0.75 | 0.77 | 0.78 | 0.82 | 0.86 | 0.87 |      |
| 3  | - | -    | -    | 0.34 | 0.39 | 0.22 | 0.35 | 0.34 | 0.52 | 0.52 | 0.58 | 0.53 | 0.60 | 0.57 | 0.62 | 0.58 | 0.62 | 0.61 | 0.64 | 0.68 | 0.69 |      |
| 8  | - | -    | -    | -    | 0.29 | 0.25 | 0.33 | 0.36 | 0.43 | 0.43 | 0.46 | 0.47 | 0.44 | 0.47 | 0.47 | 0.52 | 0.51 | 0.52 | 0.53 | 0.57 | 0.56 |      |
| 15 | - | -    | -    | -    | -    | 0.32 | 0.29 | 0.44 | 0.41 | 0.42 | 0.39 | 0.46 | 0.42 | 0.42 | 0.44 | 0.50 | 0.47 | 0.53 | 0.53 | 0.56 | 0.57 |      |
| 5  | - | -    | -    | -    | -    | -    | 0.29 | 0.19 | 0.45 | 0.47 | 0.45 | 0.46 | 0.45 | 0.45 | 0.55 | 0.50 | 0.52 | 0.48 | 0.56 | 0.54 | 0.55 |      |
| 6  | - | -    | -    | -    | -    | -    | -    | 0.32 | 0.34 | 0.40 | 0.37 | 0.32 | 0.43 | 0.28 | 0.45 | 0.33 | 0.46 | 0.41 | 0.47 | 0.44 | 0.51 |      |
| 19 | - | -    | -    | -    | -    | -    | -    | -    | 0.32 | 0.34 | 0.33 | 0.31 | 0.32 | 0.31 | 0.36 | 0.34 | 0.35 | 0.32 | 0.38 | 0.36 | 0.37 |      |
| 13 | - | -    | -    | -    | -    | -    | -    | -    | -    | 0.26 | 0.23 | 0.23 | 0.24 | 0.23 | 0.31 | 0.25 | 0.27 | 0.30 | 0.30 | 0.32 | 0.32 |      |
| 10 | - | -    | -    | -    | -    | -    | -    | -    | -    | -    | 0.24 | 0.25 | 0.29 | 0.27 | 0.23 | 0.27 | 0.28 | 0.26 | 0.25 | 0.29 | 0.29 |      |
| 17 | - | -    | -    | -    | -    | -    | -    | -    | -    | -    | -    | 0.25 | 0.22 | 0.19 | 0.23 | 0.27 | 0.23 | 0.25 | 0.24 | 0.27 | 0.28 |      |
| 12 | - | -    | -    | -    | -    | -    | -    | -    | -    | -    | -    | -    | 0.23 | 0.18 | 0.23 | 0.07 | 0.24 | 0.23 | 0.24 | 0.24 | 0.26 |      |
| 9  | - | -    | -    | -    | -    | -    | -    | -    | -    | -    | -    | -    | -    | 0.20 | 0.21 | 0.24 | 0.23 | 0.22 | 0.24 | 0.24 | 0.24 |      |
| 18 | - | -    | -    | -    | -    | -    | -    | -    | -    | -    | -    | -    | -    | -    | 0.23 | 0.17 | 0.23 | 0.22 | 0.23 | 0.24 | 0.24 |      |
| 11 | - | -    | -    | -    | -    | -    | -    | -    | -    | -    | -    | -    | -    | -    | -    | 0.20 | 0.16 | 0.19 | 0.20 | 0.20 | 0.21 |      |
| 21 | - | -    | -    | -    | -    | -    | -    | -    | -    | -    | -    | -    | -    | -    | -    | -    | 0.18 | 0.17 | 0.18 | 0.18 | 0.19 |      |
| 14 | - | -    | -    | -    | -    | -    | -    | -    | -    | -    | -    | -    | -    | -    | -    | -    | -    | 0.17 | 0.18 | 0.18 | 0.18 |      |
| 7  | - | -    | -    | -    | -    | -    | -    | -    | -    | -    | -    | -    | -    | -    | -    | -    | -    | -    | 0.16 | 0.08 | 0.17 |      |
| 4  | - | -    | -    | -    | -    | -    | -    | -    | -    | -    | -    | -    | -    | -    | -    | -    | -    | -    | -    | -    | 0.13 | 0.14 |
| 20 | - | -    | -    | -    | -    | -    | -    | -    | -    | -    | -    | -    | -    | -    | -    | -    | -    | -    | -    | -    | -    | 0.09 |
| 2  | - | -    | -    | -    | -    | -    | -    | -    | -    | -    | -    | -    | -    | -    | -    | -    | -    | -    | -    | -    | -    | -    |

Table S17: Proportion of models containing A not B

| A  | B |      |      |      |      |      |      |      |      |      |      |      |      |      |      |      |      |      |      |      |      |
|----|---|------|------|------|------|------|------|------|------|------|------|------|------|------|------|------|------|------|------|------|------|
|    | 1 | 16   | 3    | 8    | 15   | 5    | 6    | 19   | 13   | 10   | 17   | 12   | 9    | 18   | 11   | 21   | 14   | 7    | 4    | 20   | 2    |
| 1  | - | 0.04 | 0.03 | 0.01 | 0.03 | 0.03 | 0.03 | 0.01 | 0.04 | 0.00 | 0.03 | 0.01 | 0.01 | 0.00 | 0.00 | 0.01 | 0.02 | 0.01 | 0.01 | 0.01 | 0.00 |
| 16 | - | -    | 0.03 | 0.04 | 0.05 | 0.00 | 0.02 | 0.00 | 0.01 | 0.04 | 0.04 | 0.01 | 0.01 | 0.01 | 0.04 | 0.00 | 0.02 | 0.01 | 0.02 | 0.01 | 0.00 |
| 3  | - | -    | -    | 0.21 | 0.25 | 0.08 | 0.13 | 0.00 | 0.10 | 0.08 | 0.12 | 0.05 | 0.11 | 0.07 | 0.09 | 0.03 | 0.06 | 0.04 | 0.04 | 0.02 | 0.02 |
| 8  | - | -    | -    | -    | 0.29 | 0.24 | 0.25 | 0.16 | 0.16 | 0.14 | 0.14 | 0.13 | 0.09 | 0.11 | 0.08 | 0.11 | 0.09 | 0.09 | 0.06 | 0.05 | 0.03 |
| 15 | - | -    | -    | -    | -    | 0.31 | 0.21 | 0.25 | 0.13 | 0.12 | 0.07 | 0.12 | 0.08 | 0.06 | 0.05 | 0.09 | 0.05 | 0.09 | 0.07 | 0.05 | 0.04 |
| 5  | - | -    | -    | -    | -    | -    | 0.22 | 0.00 | 0.18 | 0.18 | 0.13 | 0.12 | 0.11 | 0.10 | 0.16 | 0.09 | 0.10 | 0.05 | 0.10 | 0.03 | 0.02 |
| 6  | - | -    | -    | -    | -    | -    | -    | 0.20 | 0.14 | 0.18 | 0.12 | 0.06 | 0.15 | 0.00 | 0.14 | 0.00 | 0.11 | 0.05 | 0.08 | 0.00 | 0.05 |
| 19 | - | -    | -    | -    | -    | -    | -    | -    | 0.24 | 0.24 | 0.21 | 0.17 | 0.17 | 0.15 | 0.17 | 0.13 | 0.12 | 0.08 | 0.11 | 0.04 | 0.04 |
| 13 | - | -    | -    | -    | -    | -    | -    | -    | -    | 0.24 | 0.19 | 0.17 | 0.16 | 0.15 | 0.19 | 0.11 | 0.13 | 0.14 | 0.11 | 0.08 | 0.06 |
| 10 | - | -    | -    | -    | -    | -    | -    | -    | -    | -    | 0.22 | 0.20 | 0.24 | 0.21 | 0.13 | 0.16 | 0.16 | 0.13 | 0.08 | 0.07 | 0.06 |
| 17 | - | -    | -    | -    | -    | -    | -    | -    | -    | -    | -    | 0.23 | 0.20 | 0.15 | 0.16 | 0.18 | 0.13 | 0.14 | 0.09 | 0.07 | 0.07 |
| 12 | - | -    | -    | -    | -    | -    | -    | -    | -    | -    | -    | -    | 0.22 | 0.17 | 0.18 | 0.00 | 0.16 | 0.14 | 0.12 | 0.07 | 0.07 |
| 9  | - | -    | -    | -    | -    | -    | -    | -    | -    | -    | -    | -    | -    | 0.20 | 0.17 | 0.18 | 0.16 | 0.14 | 0.12 | 0.08 | 0.06 |
| 18 | - | -    | -    | -    | -    | -    | -    | -    | -    | -    | -    | -    | -    | -    | 0.19 | 0.12 | 0.16 | 0.15 | 0.12 | 0.08 | 0.06 |
| 11 | - | -    | -    | -    | -    | -    | -    | -    | -    | -    | -    | -    | -    | -    | -    | 0.18 | 0.13 | 0.15 | 0.13 | 0.08 | 0.07 |
| 21 | - | -    | -    | -    | -    | -    | -    | -    | -    | -    | -    | -    | -    | -    | -    | -    | 0.17 | 0.14 | 0.12 | 0.07 | 0.07 |
| 14 | - | -    | -    | -    | -    | -    | -    | -    | -    | -    | -    | -    | -    | -    | -    | -    | -    | 0.16 | 0.13 | 0.09 | 0.07 |
| 7  | - | -    | -    | -    | -    | -    | -    | -    | -    | -    | -    | -    | -    | -    | -    | -    | -    | -    | 0.13 | 0.00 | 0.07 |
| 4  | - | -    | -    | -    | -    | -    | -    | -    | -    | -    | -    | -    | -    | -    | -    | -    | -    | -    | -    | 0.09 | 0.07 |
| 20 | - | -    | -    | -    | -    | -    | -    | -    | -    | -    | -    | -    | -    | -    | -    | -    | -    | -    | -    | -    | 0.07 |
| 2  | - | -    | -    | -    | -    | -    | -    | -    | -    | -    | -    | -    | -    | -    | -    | -    | -    | -    | -    | -    | -    |

Table S18: Proportion of models containing B not A

| A  | B |      |      |      |      |      |      |      |      |      |      |      |      |      |      |      |      |      |      |      |      |
|----|---|------|------|------|------|------|------|------|------|------|------|------|------|------|------|------|------|------|------|------|------|
|    | 1 | 16   | 3    | 8    | 15   | 5    | 6    | 19   | 13   | 10   | 17   | 12   | 9    | 18   | 11   | 21   | 14   | 7    | 4    | 20   | 2    |
| 1  | - | 0.00 | 0.01 | 0.03 | 0.01 | 0.02 | 0.01 | 0.03 | 0.00 | 0.04 | 0.02 | 0.04 | 0.04 | 0.04 | 0.04 | 0.04 | 0.02 | 0.03 | 0.04 | 0.04 | 0.04 |
| 16 | - | -    | 0.03 | 0.02 | 0.00 | 0.05 | 0.03 | 0.05 | 0.05 | 0.02 | 0.01 | 0.05 | 0.05 | 0.05 | 0.02 | 0.05 | 0.04 | 0.05 | 0.03 | 0.05 | 0.05 |
| 3  | - | -    | -    | 0.05 | 0.00 | 0.17 | 0.12 | 0.25 | 0.15 | 0.17 | 0.13 | 0.20 | 0.14 | 0.18 | 0.16 | 0.22 | 0.19 | 0.21 | 0.21 | 0.23 | 0.23 |
| 8  | - | -    | -    | -    | 0.10 | 0.15 | 0.14 | 0.23 | 0.23 | 0.25 | 0.25 | 0.26 | 0.30 | 0.28 | 0.31 | 0.28 | 0.30 | 0.30 | 0.33 | 0.34 | 0.36 |
| 15 | - | -    | -    | -    | -    | 0.08 | 0.18 | 0.14 | 0.26 | 0.27 | 0.32 | 0.27 | 0.32 | 0.33 | 0.34 | 0.30 | 0.34 | 0.30 | 0.32 | 0.34 | 0.35 |
| 5  | - | -    | -    | -    | -    | -    | 0.17 | 0.39 | 0.22 | 0.21 | 0.26 | 0.27 | 0.28 | 0.30 | 0.23 | 0.30 | 0.29 | 0.34 | 0.30 | 0.36 | 0.37 |
| 6  | - | -    | -    | -    | -    | -    | -    | 0.27 | 0.32 | 0.29 | 0.34 | 0.41 | 0.31 | 0.47 | 0.33 | 0.47 | 0.35 | 0.41 | 0.39 | 0.47 | 0.41 |
| 19 | - | -    | -    | -    | -    | -    | -    | -    | 0.34 | 0.34 | 0.38 | 0.42 | 0.42 | 0.43 | 0.42 | 0.46 | 0.46 | 0.51 | 0.48 | 0.54 | 0.55 |
| 13 | - | -    | -    | -    | -    | -    | -    | -    | -    | 0.43 | 0.48 | 0.50 | 0.50 | 0.52 | 0.47 | 0.55 | 0.54 | 0.53 | 0.56 | 0.59 | 0.60 |
| 10 | - | -    | -    | -    | -    | -    | -    | -    | -    | -    | 0.47 | 0.48 | 0.45 | 0.48 | 0.55 | 0.53 | 0.53 | 0.56 | 0.61 | 0.62 | 0.63 |
| 17 | - | -    | -    | -    | -    | -    | -    | -    | -    | -    | -    | 0.48 | 0.51 | 0.56 | 0.55 | 0.53 | 0.58 | 0.57 | 0.62 | 0.64 | 0.64 |
| 12 | - | -    | -    | -    | -    | -    | -    | -    | -    | -    | -    | -    | 0.51 | 0.56 | 0.55 | 0.73 | 0.57 | 0.59 | 0.61 | 0.66 | 0.66 |
| 9  | - | -    | -    | -    | -    | -    | -    | -    | -    | -    | -    | -    | -    | 0.54 | 0.57 | 0.56 | 0.58 | 0.60 | 0.62 | 0.66 | 0.68 |
| 18 | - | -    | -    | -    | -    | -    | -    | -    | -    | -    | -    | -    | -    | -    | 0.55 | 0.63 | 0.58 | 0.60 | 0.62 | 0.67 | 0.68 |
| 11 | - | -    | -    | -    | -    | -    | -    | -    | -    | -    | -    | -    | -    | -    | -    | 0.60 | 0.65 | 0.63 | 0.65 | 0.70 | 0.71 |
| 21 | - | -    | -    | -    | -    | -    | -    | -    | -    | -    | -    | -    | -    | -    | -    | -    | 0.63 | 0.66 | 0.68 | 0.73 | 0.73 |
| 14 | - | -    | -    | -    | -    | -    | -    | -    | -    | -    | -    | -    | -    | -    | -    | -    | -    | 0.65 | 0.68 | 0.72 | 0.74 |
| 7  | - | -    | -    | -    | -    | -    | -    | -    | -    | -    | -    | -    | -    | -    | -    | -    | -    | -    | 0.69 | 0.82 | 0.76 |
| 4  | - | -    | -    | -    | -    | -    | -    | -    | -    | -    | -    | -    | -    | -    | -    | -    | -    | -    | -    | 0.77 | 0.78 |
| 20 | - | -    | -    | -    | -    | -    | -    | -    | -    | -    | -    | -    | -    | -    | -    | -    | -    | -    | -    | -    | 0.83 |
| 2  | - | -    | -    | -    | -    | -    | -    | -    | -    | -    | -    | -    | -    | -    | -    | -    | -    | -    | -    | -    | -    |

Table S19: Proportion of models containing neither A nor B

| A  | B    |      |      |      |      |      |      |      |      |      |      |      |      |      |      |      |      |      |      |      |      |
|----|------|------|------|------|------|------|------|------|------|------|------|------|------|------|------|------|------|------|------|------|------|
|    | 1    | 16   | 3    | 8    | 15   | 5    | 6    | 19   | 13   | 10   | 17   | 12   | 9    | 18   | 11   | 21   | 14   | 7    | 4    | 20   | 2    |
| 1  |      | 1    | 0.72 | 0.22 | 0.69 | 0.66 | 0.75 | 0.25 | 0.94 | 0.09 | 0.66 | 0.19 | 0.16 | 0    | 0.03 | 0.16 | 0.53 | 0.28 | 0.19 | 0.16 | 0.03 |
| 16 | 1    |      | 0.54 | 0.68 | 0.98 | 0.07 | 0.41 | 0.02 | 0.15 | 0.66 | 0.78 | 0.20 | 0.15 | 0.10 | 0.66 | 0.07 | 0.29 | 0.20 | 0.41 | 0.15 | 0.02 |
| 3  | 0.95 | 0.90 |      | 0.82 | 0.99 | 0.31 | 0.52 | 0    | 0.41 | 0.33 | 0.49 | 0.20 | 0.44 | 0.28 | 0.37 | 0.11 | 0.23 | 0.17 | 0.15 | 0.09 | 0.07 |
| 8  | 0.91 | 0.95 | 0.88 |      | 0.73 | 0.62 | 0.64 | 0.41 | 0.40 | 0.35 | 0.36 | 0.33 | 0.23 | 0.28 | 0.19 | 0.28 | 0.23 | 0.23 | 0.15 | 0.13 | 0.07 |
| 15 | 0.96 | 1    | 0.99 | 0.74 |      | 0.80 | 0.54 | 0.63 | 0.34 | 0.31 | 0.18 | 0.30 | 0.19 | 0.16 | 0.12 | 0.22 | 0.13 | 0.24 | 0.17 | 0.12 | 0.11 |
| 5  | 0.96 | 0.87 | 0.56 | 0.62 | 0.80 |      | 0.56 | 0    | 0.45 | 0.46 | 0.33 | 0.31 | 0.28 | 0.24 | 0.40 | 0.24 | 0.26 | 0.13 | 0.25 | 0.07 | 0.06 |
| 6  | 0.98 | 0.93 | 0.74 | 0.70 | 0.61 | 0.63 |      | 0.43 | 0.31 | 0.38 | 0.26 | 0.12 | 0.33 | 0    | 0.30 | 0    | 0.24 | 0.12 | 0.16 | 0    | 0.12 |
| 19 | 0.94 | 0.91 | 0.57 | 0.61 | 0.75 | 0.33 | 0.54 |      | 0.42 | 0.41 | 0.36 | 0.29 | 0.29 | 0.26 | 0.29 | 0.22 | 0.21 | 0.14 | 0.18 | 0.07 | 0.07 |
| 13 | 1    | 0.93 | 0.78 | 0.65 | 0.61 | 0.68 | 0.51 | 0.48 |      | 0.35 | 0.28 | 0.26 | 0.25 | 0.22 | 0.29 | 0.17 | 0.19 | 0.21 | 0.16 | 0.12 | 0.09 |
| 10 | 0.94 | 0.97 | 0.76 | 0.63 | 0.61 | 0.69 | 0.58 | 0.50 | 0.37 |      | 0.32 | 0.30 | 0.35 | 0.30 | 0.19 | 0.23 | 0.23 | 0.19 | 0.11 | 0.10 | 0.08 |
| 17 | 0.98 | 0.98 | 0.82 | 0.65 | 0.55 | 0.63 | 0.52 | 0.47 | 0.32 | 0.34 |      | 0.32 | 0.28 | 0.21 | 0.22 | 0.25 | 0.19 | 0.20 | 0.13 | 0.10 | 0.09 |
| 12 | 0.95 | 0.94 | 0.72 | 0.64 | 0.63 | 0.63 | 0.44 | 0.42 | 0.32 | 0.34 | 0.34 |      | 0.30 | 0.23 | 0.25 | 0    | 0.22 | 0.19 | 0.16 | 0.09 | 0.10 |
| 9  | 0.95 | 0.93 | 0.81 | 0.59 | 0.57 | 0.62 | 0.58 | 0.43 | 0.32 | 0.39 | 0.30 | 0.31 |      | 0.27 | 0.23 | 0.24 | 0.22 | 0.19 | 0.16 | 0.10 | 0.08 |
| 18 | 0.94 | 0.93 | 0.76 | 0.63 | 0.56 | 0.60 | 0.38 | 0.42 | 0.31 | 0.36 | 0.25 | 0.24 | 0.27 |      | 0.26 | 0.16 | 0.22 | 0.20 | 0.17 | 0.11 | 0.08 |
| 11 | 0.95 | 0.98 | 0.80 | 0.60 | 0.56 | 0.70 | 0.58 | 0.47 | 0.39 | 0.29 | 0.29 | 0.30 | 0.27 | 0.29 |      | 0.23 | 0.17 | 0.20 | 0.16 | 0.10 | 0.08 |
| 21 | 0.95 | 0.93 | 0.72 | 0.65 | 0.62 | 0.63 | 0.42 | 0.43 | 0.31 | 0.34 | 0.33 | 0.09 | 0.30 | 0.22 | 0.25 |      | 0.21 | 0.18 | 0.15 | 0.09 | 0.09 |
| 14 | 0.97 | 0.95 | 0.76 | 0.63 | 0.58 | 0.64 | 0.56 | 0.43 | 0.34 | 0.35 | 0.29 | 0.30 | 0.29 | 0.28 | 0.20 | 0.22 |      | 0.20 | 0.17 | 0.11 | 0.09 |
| 7  | 0.96 | 0.94 | 0.75 | 0.64 | 0.64 | 0.58 | 0.50 | 0.38 | 0.36 | 0.32 | 0.31 | 0.28 | 0.27 | 0.27 | 0.24 | 0.20 | 0.21 |      | 0.16 | 0    | 0.08 |
| 4  | 0.96 | 0.96 | 0.75 | 0.61 | 0.62 | 0.65 | 0.54 | 0.44 | 0.35 | 0.29 | 0.28 | 0.29 | 0.28 | 0.27 | 0.24 | 0.21 | 0.21 | 0.19 |      | 0.10 | 0.09 |
| 20 | 0.96 | 0.95 | 0.75 | 0.63 | 0.62 | 0.60 | 0.48 | 0.40 | 0.35 | 0.32 | 0.29 | 0.27 | 0.27 | 0.27 | 0.22 | 0.20 | 0.20 | 0.09 | 0.15 |      | 0.08 |
| 2  | 0.95 | 0.94 | 0.75 | 0.61 | 0.62 | 0.60 | 0.55 | 0.40 | 0.34 | 0.32 | 0.30 | 0.28 | 0.26 | 0.26 | 0.22 | 0.21 | 0.20 | 0.18 | 0.15 | 0.10 |      |

Table S20: Conditional probability of B given (not A)

| j | B |    |      |      |      |      |      |      |      |      |      |      |      |      |      |      |      |      |      |      |      |
|---|---|----|------|------|------|------|------|------|------|------|------|------|------|------|------|------|------|------|------|------|------|
|   | 1 | 16 | 3    | 8    | 15   | 5    | 6    | 19   | 13   | 10   | 17   | 12   | 9    | 18   | 11   | 21   | 14   | 7    | 4    | 20   | 2    |
| 2 | 1 | 1  | 0.76 | 0.63 | 0.58 | 0.64 | 0.53 | 0.45 | 0.32 | 0.30 | 0.24 | 0.30 | 0.27 | 0.28 | 0.20 | 0.21 | 0.17 | 0.17 | 0.13 | 0.09 | 0.08 |
| 3 | 1 | 1  | 1    | 0.55 | 0.46 | 0.73 | 0.53 | 0.58 | 0.29 | 0.30 | 0.19 | 0.31 | 0.21 | 0.26 | 0.16 | 0.24 | 0.16 | 0.18 | 0.13 | 0.09 | 0.09 |
| 4 | 1 | 1  | 1    | 0.59 | 0.40 | 1    | 0.51 | 0.79 | 0.23 | 0.23 | 0.20 | 0.26 | 0.23 | 0.26 | 0.10 | 0.19 | 0.13 | 0.21 | 0.08 | 0.11 | 0.10 |
| 5 | 1 | 1  | 1    | 0.63 | 0.39 | 1    | 0.51 | 1    | 0.20 | 0.17 | 0.18 | 0.25 | 0.24 | 0.25 | 0.11 | 0.17 | 0.15 | 0.23 | 0.09 | 0.12 | 0.10 |
| 6 | 1 | 1  | 1    | 1    | 0.24 | 1    | 0.45 | 1    | 0.20 | 0.11 | 0.16 | 0.20 | 0.24 | 0.20 | 0.11 | 0.10 | 0.10 | 0.20 | 0.10 | 0.10 | 0.10 |

Table S21: Probability that variable B is included conditional on inclusion of the most probable set of size  $j$

22

| j | B |    |   |      |      |      |      |    |      |      |      |      |      |      |      |      |      |      |      |      |      |
|---|---|----|---|------|------|------|------|----|------|------|------|------|------|------|------|------|------|------|------|------|------|
|   | 1 | 16 | 3 | 8    | 15   | 5    | 6    | 19 | 13   | 10   | 17   | 12   | 9    | 18   | 11   | 21   | 14   | 7    | 4    | 20   | 2    |
| 3 | 1 | 1  | 0 | 0.86 | 0.99 | 0.32 | 0.53 | 0  | 0.41 | 0.30 | 0.41 | 0.19 | 0.48 | 0.33 | 0.35 | 0.11 | 0.20 | 0.14 | 0.12 | 0.07 | 0.06 |
| 4 | 1 | 1  | 0 | 0.89 | 0.99 | 0    | 0.52 | 0  | 0.50 | 0.36 | 0.31 | 0.20 | 0.48 | 0.30 | 0.48 | 0.13 | 0.24 | 0.15 | 0.15 | 0.08 | 0.07 |
| 5 | 1 | 1  | 0 | 0.89 | 0.99 | 0    | 0.52 | 0  | 0.50 | 0.36 | 0.31 | 0.20 | 0.48 | 0.30 | 0.48 | 0.13 | 0.24 | 0.15 | 0.15 | 0.08 | 0.07 |
| 6 | 1 | 1  | 0 | 0    | 1    | 0    | 0.50 | 0  | 0.50 | 0.58 | 0.83 | 0    | 0.50 | 0    | 0.42 | 0    | 0.33 | 0.25 | 0.25 | 0.25 | 0    |

Table S22: Probability that variable B is included conditional on inclusion of  $\{1, 16\}$  and non inclusion of the remaining variable(s) in the most probable set of size  $j$ .
